# Supplementary material for: Understanding the fate of chlorogenic acids in coffee roasting using mass spectrometry based targeted and non-targeted analytical strategies
Source: Royal Society of Chemistry journal article supplement (doi:10.1039/c2fo10260a), 2012-01-01
Supplement: c2fo10260a.pdf [file c2fo10260a.pdf]

## Supplementary information

### Understanding the fate of chlorogenic acids in coffee roasting using mass spectrometry based targeted and non-targeted analytical strategies

Rakesh Jaiswal,<sup>a</sup> Marius F. Matei,<sup>a</sup> Agnieszka Golon,<sup>a</sup> Matthias Witt<sup>b</sup> and Nikolai Kuhnert<sup>a\*</sup>

Content:

1. Synthesis of *muco*-quinic acid derivatives
2. Data on carbohydrate model roast
3. Additional Van Krevelen diagrams of unique structures
4. Molecular formula table of chlorogenic acid model roast
5. Molecular formula table of coffee melanoidines
6. Tandem MS data on transesterification products and *muco* quinic acids

1. Synthesis of *muco*-quinic acid derivatives

### Synthesis of 3-caffeoyl-*muco*-quinic acid and 3-feruloyl-*muco*-quinic acid

**Synthesis of methyl 3-*O*-(4-*O*-allyl)-feruloyl-TMB-*muco*-quinic acid.** To a solution of methyl TMB-*muco*-quinic acid (1 g, 3.12 mmol) and 4-(dimethyl amino)-pyridine (DMAP) (77 mg, 0.63 mmol) in DCM (50 mL) were added pyridine (10 mL) and acid chloride (4.68 mmol) at room temperature. The reaction mixture was refluxed for 24 h and acidified with a 1 M HCl solution to pH = 3. The layers were separated and the aqueous phase was extracted with DCM (3 x 50 mL). The combined organic layers were dried over Na<sub>2</sub>SO<sub>4</sub>, filtered and the solvent was removed in vacuo. The crude product was purified by column chromatography on silica gel (ethyl acetate/petroleum ether, 30-50%) to give methyl 3-*O*-(4-*O*-allyl)-feruloyl-TMB-*muco*-quinic acid as a pale yellow powder (1.60 g, 96%), mp 101-103 °C;  $\nu_{\max}/\text{cm}^{-1}$  (KBr) 3423br, 3080w, 2992, 2951, 1749s, 1713s, 1631vs, 1597vs, 1264s, 1139;  $\delta_{\text{H}}$  (CDCl<sub>3</sub>): 1.24 (3H, s, CH<sub>3</sub>), 1.26 (3H, s, CH<sub>3</sub>), 1.86 (1H, dd, *J* 13.0, 11.4, 6-*HH*), 1.89 (1H, ddd, *J* 12.5, 5, 2.2, 2-

*HH*), 1.97 (1H, t, *J* 12.5, 6-*HH*), 2.25 (1H, ddd, *J* 12.8, 5.0, 2.3, 2-*HH*), 3.20 (3H, s, COCH<sub>3</sub>), 3.28 (3H, s, COCH<sub>3</sub>), 3.75 (1H, t, *J* 10.1, 4-H), 3.75 (3H, s, COOCH<sub>3</sub>), 3.87 (3H, s, C<sub>Ar</sub>-OCH<sub>3</sub>), 4.09 (1H, ddd, *J* 11.4, 5.0, 1.8, 3-H), 4.60 (2H, d, *J* 2.3, C<sub>Ar</sub>-OCH<sub>2</sub>), 5.27 (2H, m, CHH=CH), 5.38 (1H, ddd, *J* 12.8, 2.5, 1.4, CHH=CH), 6.1 (1H, m, CH<sub>2</sub>=CH), 6.23 (1H, d, *J* 16.0, C<sub>Ar</sub>-CH=CH), 6.82 (1H, d, *J* 8.7, C<sub>Ar</sub>H), 7.04 (2H, m, C<sub>Ar</sub>H), 7.57 (1H, d, *J* 16.0, C<sub>Ar</sub>-CH); δ<sub>C</sub> (CDCl<sub>3</sub>): 17.7 (CH<sub>3</sub>), 17.8 (CH<sub>3</sub>), 37.5 (C-2), 38.9 (C-6), 47.8 (COCH<sub>3</sub>), 48.0 (COCH<sub>3</sub>), 53.2 (COOCH<sub>3</sub>), 56.0 (Ar-OCH<sub>3</sub>), 65.6 (C-3), 69.3 (C-5), 69.8 (C<sub>Ar</sub>-OCH<sub>2</sub>), 73.3 (C-4), 73.5 (C-1), 99.6 (COCH<sub>3</sub>), 99.7 (COCH<sub>3</sub>), 110.2 (C<sub>Ar</sub>), 112.9 (C<sub>Ar</sub>), 115.8 (CH-COO), 118.4 (CH<sub>2</sub>=CH), 122.5 (C<sub>Ar</sub>), 127.6 (C<sub>Ar</sub>-CH), 132.8 (CH<sub>2</sub>=CH), 144.9 (C<sub>Ar</sub>-CH), 149.6 (C<sub>Ar</sub>-OCH<sub>3</sub>), 150.2 (C<sub>Ar</sub>-OCH<sub>2</sub>), 166.3 (CH-COO), 175.2 (COOCH<sub>3</sub>); HRMS (ESI<sup>+</sup>): Exact mass calculated for C<sub>27</sub>H<sub>36</sub>O<sub>11</sub>Na [M+Na<sup>+</sup>]<sup>+</sup>, 559.2155. Found 559.2154.

**Synthesis of 3-*O*-feruloyl-*muco*-quinic acid.** To a solution of methyl 3-*O*-(4-*O*-allyl)-feruloyl-TMB-*muco*-quinic acid (537 mg, 1 mmol), and *p*-TsOH (20 mg, 0.105 mmol) in methanol-water (9:1, 30 mL) was added 10% Pd/C (195 mg) at room temperature. The reaction mixture was heated at 60 °C for 48 h, cooled to room temperature, filtered and methanol was removed in vacuo. Aqueous reaction mixture was extracted with ethyl acetate (3 x 50 mL). The combined organic layers were dried over Na<sub>2</sub>SO<sub>4</sub>, filtered and the solvent was removed in vacuo. The crude product was purified by column chromatography on silica gel (ethyl acetate/petroleum ether, 60-80%) to give methyl 3-*O*-feruloyl-TMB-*muco*-quinic acid pale yellow powder (471 mg, 95%). Methyl 3-*O*-feruloyl-TMB-*muco*-quinic acid (471 mg, 0.95 mmol) was dissolved in a TFA (90% aq. solution, 20 mL) at 0 °C and the solution was stirred for 5 h at room temperature. The solvents were removed in vacuo to afford the target compound which was analyzed by HPLC-MS.

**Synthesis of methyl 3-*O*-(3,4-di-*O*-allyl)-caffeoyl-TMB-*muco*-quininate.** To a solution of methyl TMB-*muco*-quininate (1 g, 3.12 mmol) and DMAP (77 mg, 0.63 mmol) in DCM (50 mL) were added pyridine (10 mL) and acid chloride **7** (1.30 g, 4.68 mmol) at room temperature. The reaction mixture was refluxed for 36 h and acidified with a 1 M HCl solution to pH = 3. The layers were separated and the aqueous phase was extracted with DCM (3 x 50 mL). The combined organic layers were dried over Na<sub>2</sub>SO<sub>4</sub>, filtered and the solvent was removed in vacuo. The crude product was purified by column chromatography on silica gel (ethyl acetate/petroleum ether, 20-40%) to give methyl 3-*O*-(3,4-di-*O*-allyl)-caffeoyl-TMB-*muco*-quininate as a pale yellow powder (1.66 g, 95%), mp 82-84 °C;  $\nu_{\max}/\text{cm}^{-1}$  (KBr) 3423, 2951, 2992, 3080, 1749, 1713, 1631, 1597, 1511, 1264, 1139, 1076;  $\delta_{\text{H}}$  (CDCl<sub>3</sub>): 1.28 (6H, s, CH<sub>3</sub>), 1.85 (2H, m, 6-*HH*, 2-*HH*), 1.99 (1H, t, *J* 12.4, 6-*HH*), 2.23 (1H, m, 2-*HH*), 3.16 (1H, m, 2-*HH*), 3.24 (6H, s, COCH<sub>3</sub>), 3.31 (3H, s, COOCH<sub>3</sub>), 3.77 (1H, t, *J* 10, 4-*H*), 4.10 (1H, ddd, *J* 14.2, 12.3, 5, 3-*H*), 4.6 (4H, m, C<sub>Ar</sub>-OCH<sub>2</sub>), 5.29 (2H, d, *J* 9.62, CHH=CH), 5.43 (2H, d, *J* 16.9, CHH=CH), 6.06 (2H, m, CH<sub>2</sub>=CH), 6.21 (1H, d, *J* 16, C<sub>Ar</sub>-CH=CH), 6.85 (1H, d, *J* 8.7, C<sub>Ar</sub>H), 7.04 (2H, m, C<sub>Ar</sub>H), 7.56 (1H, d, *J* 16, C<sub>Ar</sub>-CH);  $\delta_{\text{C}}$  (CDCl<sub>3</sub>): 17.7 (CH<sub>3</sub>), 17.8 (CH<sub>3</sub>), 37.5 (C-2), 38.7 (C-6), 47.7 (COCH<sub>3</sub>), 47.9 (COCH<sub>3</sub>), 53.2 (COOCH<sub>3</sub>), 65.5 (C-3), 69.2 (C-5), 69.7 (C<sub>Ar</sub>-OCH<sub>2</sub>), 70.0 (C<sub>Ar</sub>-OCH<sub>2</sub>), 73.2 (C-4), 73.46 (C-1), 99.6 (COCH<sub>3</sub>), 99.9 (COCH<sub>3</sub>), 112.9 (C<sub>Ar</sub>), 113.5 (C<sub>Ar</sub>), 115.9 (CH-COO), 117.9 (CH<sub>2</sub>=CH), 117.9 (CH<sub>2</sub>=CH), 122.4 (C<sub>Ar</sub>), 127.6 (C<sub>Ar</sub>-CH), 132.9 (CH<sub>2</sub>=CH), 133.2 (CH<sub>2</sub>=CH), 144.8 (C<sub>Ar</sub>-CH), 148.6 (C<sub>Ar</sub>-OCH<sub>2</sub>), 150.7 (C<sub>Ar</sub>-OCH<sub>2</sub>), 166.2 (CH-COO), 175.3 (COOCH<sub>3</sub>); HRMS (ESI<sup>+</sup>): Exact mass calculated for C<sub>29</sub>H<sub>38</sub>O<sub>11</sub>Na [M+Na]<sup>+</sup>, 585.2155. Found 559.2154.

**Synthesis of 3-*O*-caffeoyl-*muco*-quinic acid.** To a solution of methyl 3-*O*-(3,4-di-*O*-allyl)-caffeoyl-TMB-*muco*-quininate (562 mg, 1 mmol), and *p*-TsOH (40 mg, 0.21 mmol) in methanol-water (9:1, 30 mL) was added 10% Pd/C (390 mg) at room temperature. The reaction mixture was heated at 60 °C for 48 h, cooled to room temperature, filtered and

methanol was removed in vacuo. The aqueous reaction mixture was extracted with ethyl acetate (3 x 50 mL). The combined organic layers were dried over Na<sub>2</sub>SO<sub>4</sub>, filtered and the solvent was removed in vacuo. The crude product was purified by column chromatography on silica gel (ethyl acetate/petroleum ether, 60-90%) to give methyl 3-*O*-caffeoyl-TMB-*muco*-quininate as a pale yellow powder (461 mg, 93%). Methyl 3-*O*-caffeoyl-TMB-*muco*-quininate (461 mg, 0.93 mmol) was dissolved in a TFA solution (90% aq. solution, 20 mL) at 0 °C and the solution was stirred for 5 h at room temperature. The solvents were removed in vacuo to afford the target compound which was analyzed by HPLC-MS

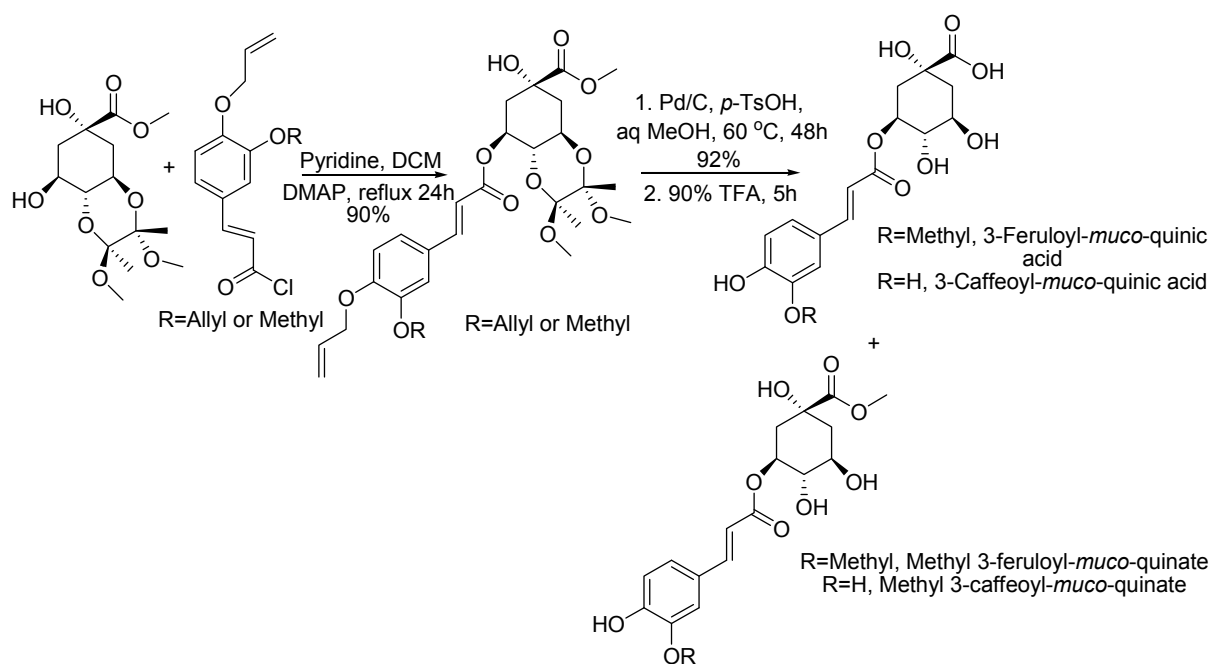

Figure 1: Synthetic scheme for the synthesis of *muco*-quinic acid derivatives

## 2. Data on carbohydrate model roast

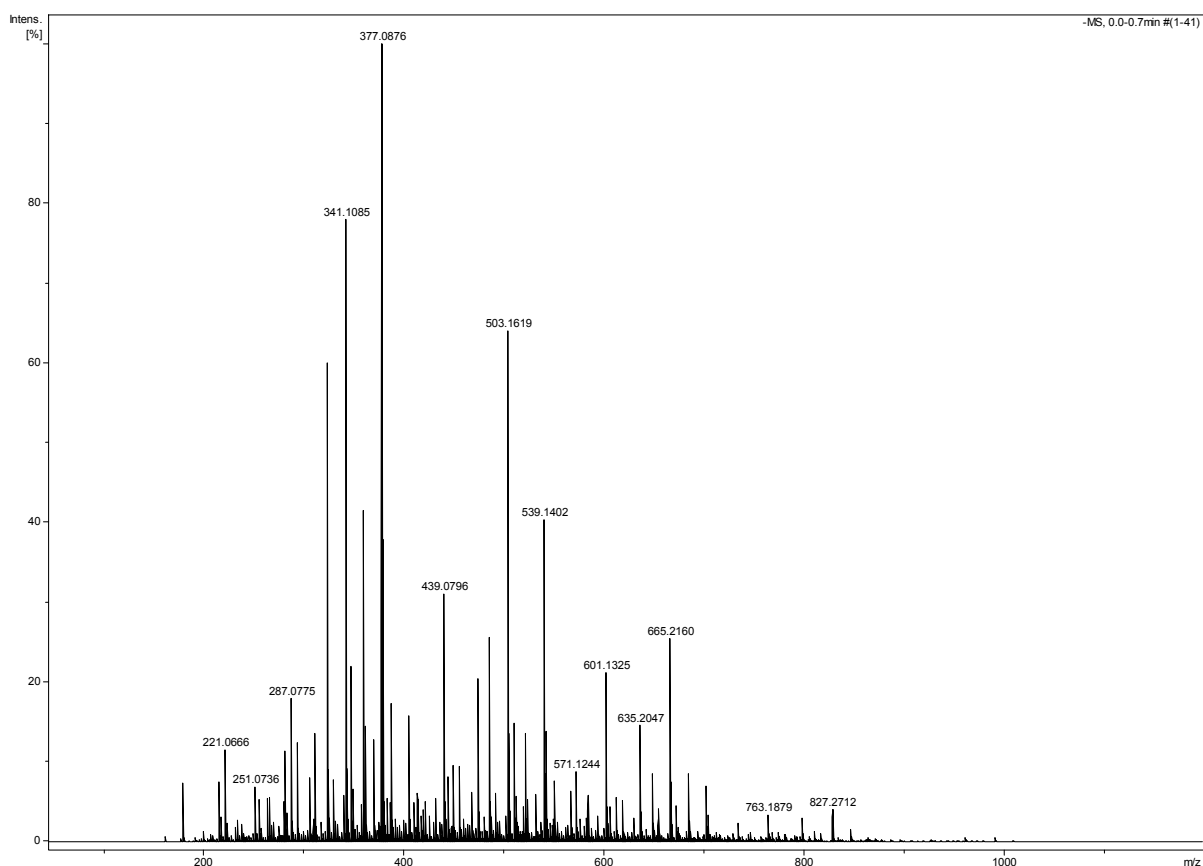

Figure 2: ESI-TOF mass spectrum of direct infusion of carbohydrate model roast in negative ion mode (Arabica coffee)

| Peak numbering | Assignment                            | Mol. Formula         | Experimental $m/z$ [M-H] | Theoretical $m/z$ [M-H] | Relative Error [ppm] |
|----------------|---------------------------------------|----------------------|--------------------------|-------------------------|----------------------|
| 1              |                                       | $C_{18}H_{18}O_9$    | 377.0876                 | 377.0878                | 1.8                  |
| 2              | (Glu) <sub>2</sub>                    | $C_{12}H_{22}O_{11}$ | 341.1085                 | 341.1089                | 1.4                  |
| 3              | (Glu) <sub>3</sub>                    | $C_{18}H_{32}O_{16}$ | 503.1620                 | 503.1618                | 0.8                  |
| 4              | (Glu) <sub>2</sub> - H <sub>2</sub> O | $C_{12}H_{20}O_{10}$ | 323.0956                 | 323.0984                | 8.6                  |

|           |                    |                      |          |          |     |
|-----------|--------------------|----------------------|----------|----------|-----|
| <b>5</b>  |                    | $C_{24}H_{28}O_{14}$ | 539.1402 | 539.1406 | 0.7 |
| <b>6</b>  |                    | $C_{26}H_{16}O_7$    | 439.0812 | 439.0823 | 2.5 |
| <b>7</b>  |                    | $C_{32}H_{22}O_5$    | 485.1425 | 485.1359 | 6.3 |
| <b>8</b>  | (Glu) <sub>2</sub> | $C_{24}H_{42}O_{21}$ | 665.2160 | 665.2146 | 2.2 |
| <b>9</b>  |                    | $C_{17}H_{16}O_8$    | 347.0769 | 347.0772 | 1.0 |
| <b>10</b> |                    | $C_{32}H_{26}O_{12}$ | 601.1325 | 601.1351 | 4.4 |
| <b>11</b> |                    | $C_{12}H_{16}O_8$    | 287.0775 | 287.0772 | 0.9 |

Table 1: Assignment of major peaks from carbohydrate model roast MS data (Arabica coffee)

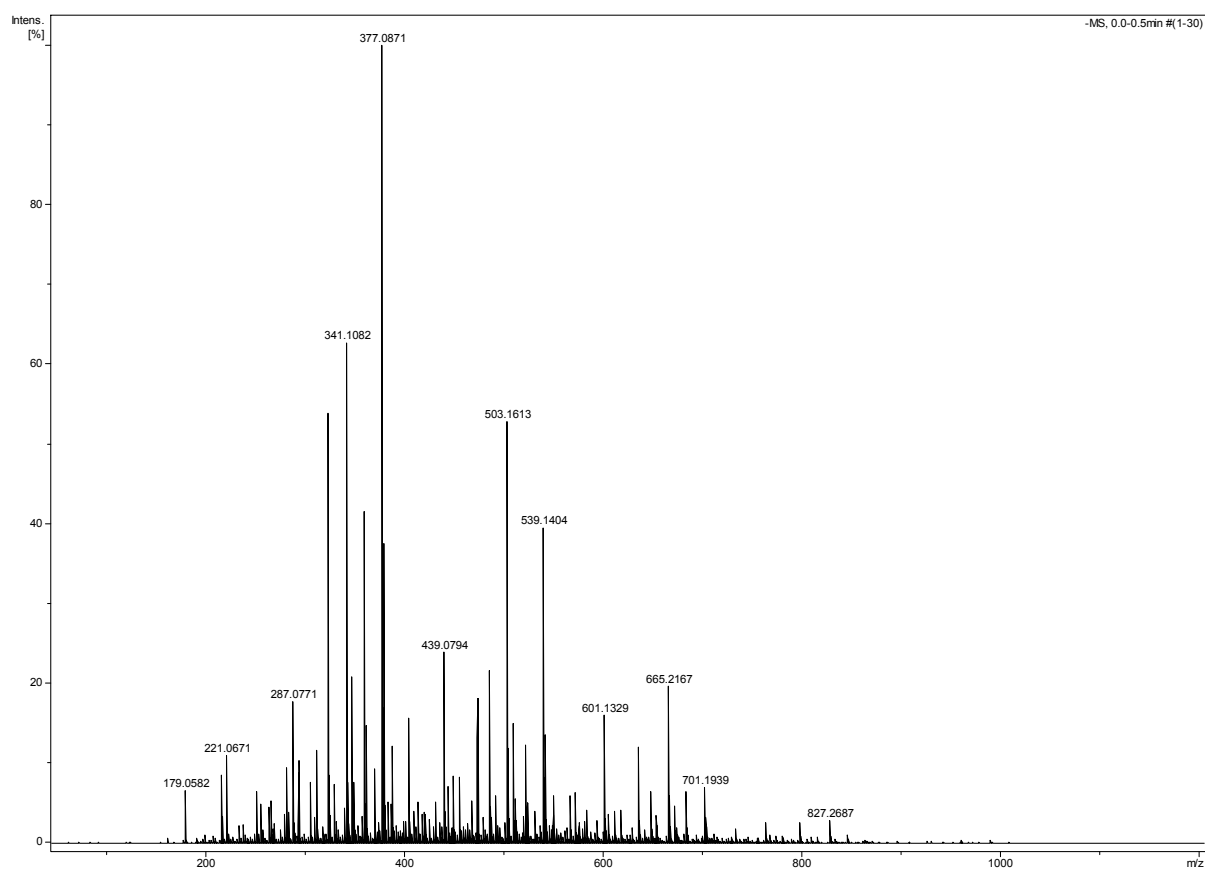

Figure 3: ESI-TOF mass spectrum of direct infusion of carbohydrate model roast in negative ion mode (Robusta coffee)

| <b>Peak numbering</b> | <b>Assignment</b>                     | <b>Mol. Formula</b>  | <b>Experimental <math>m/z</math> [M-H]</b> | <b>Theoretical <math>m/z</math> [M-H]</b> | <b>Relative Error [ppm]</b> |
|-----------------------|---------------------------------------|----------------------|--------------------------------------------|-------------------------------------------|-----------------------------|
| <b>1</b>              |                                       | $C_{18}H_{18}O_9$    | 377.0871                                   | 377.0878                                  | 1.8                         |
| <b>2</b>              | (Glu) <sub>2</sub>                    | $C_{12}H_{22}O_{11}$ | 341.1082                                   | 341.1089                                  | 2.2                         |
| <b>2</b>              | (Glu) <sub>2</sub> - H <sub>2</sub> O | $C_{12}H_{20}O_{10}$ | 323.0939                                   | 323.0984                                  | 13.7                        |
| <b>3</b>              | (Glu) <sub>3</sub>                    | $C_{18}H_{32}O_{16}$ | 503.1613                                   | 503.1618                                  | 0.8                         |
| <b>4</b>              |                                       | $C_{24}H_{28}O_{14}$ | 539.1406                                   | 539.1406                                  | 0.0                         |
| <b>5</b>              |                                       | $C_{26}H_{16}O_7$    | 439.0827                                   | 439.0823                                  | 0.8                         |
| <b>6</b>              |                                       | $C_{17}H_{16}O_8$    | 347.0772                                   | 347.0772                                  | 0.0                         |

|           |                    |                      |          |          |     |
|-----------|--------------------|----------------------|----------|----------|-----|
| <b>7</b>  |                    | $C_{32}H_{22}O_5$    | 485.1400 | 485.1394 | 1.1 |
| <b>8</b>  | (Glu) <sub>2</sub> | $C_{24}H_{42}O_{21}$ | 665.2167 | 665.2146 | 3.2 |
| <b>9</b>  |                    | $C_{12}H_{16}O_8$    | 287.0771 | 287.0772 | 0.4 |
| <b>10</b> |                    | $C_{32}H_{26}O_{12}$ | 601.1329 | 601.1351 | 3.7 |
| <b>11</b> |                    | $C_{13}H_{24}O_{13}$ | 387.1130 | 387.1144 | 3.6 |

Table 2: Assignment of major peaks from carbohydrate model roast MS data (Robusta coffee)

### 3. Additional Van Krevelen diagrams of unique structures

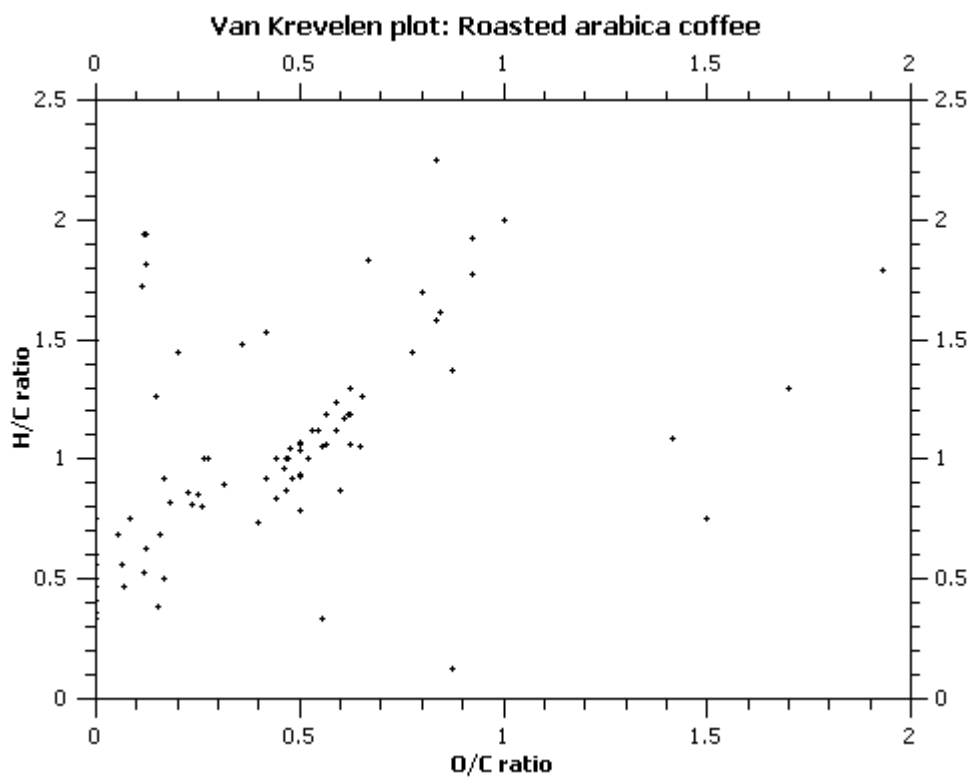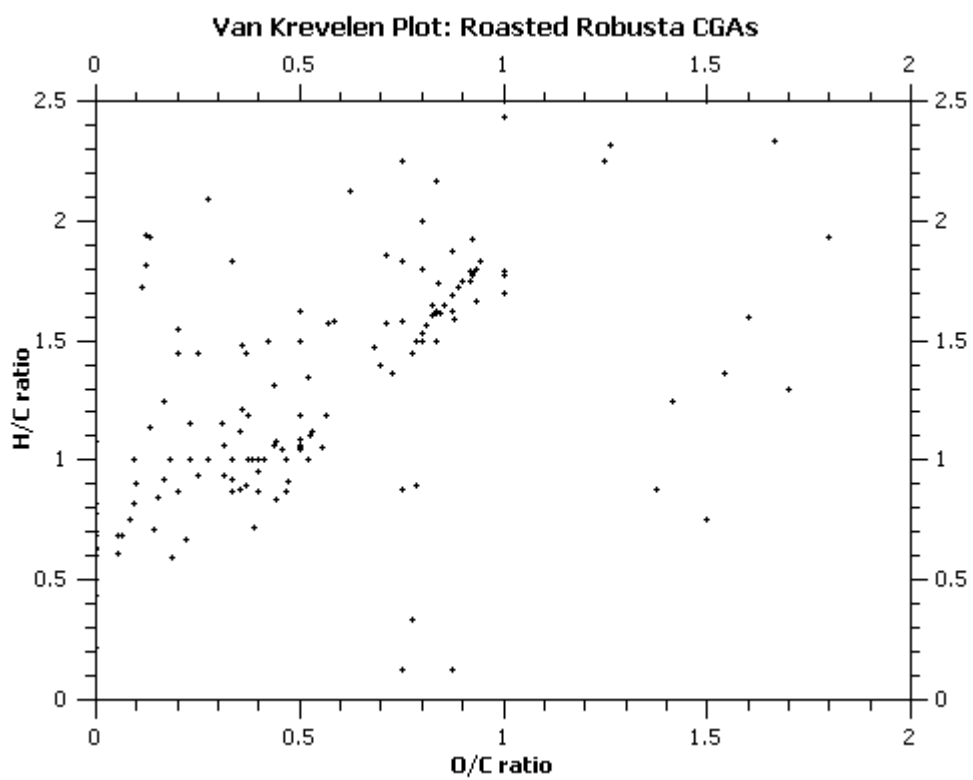



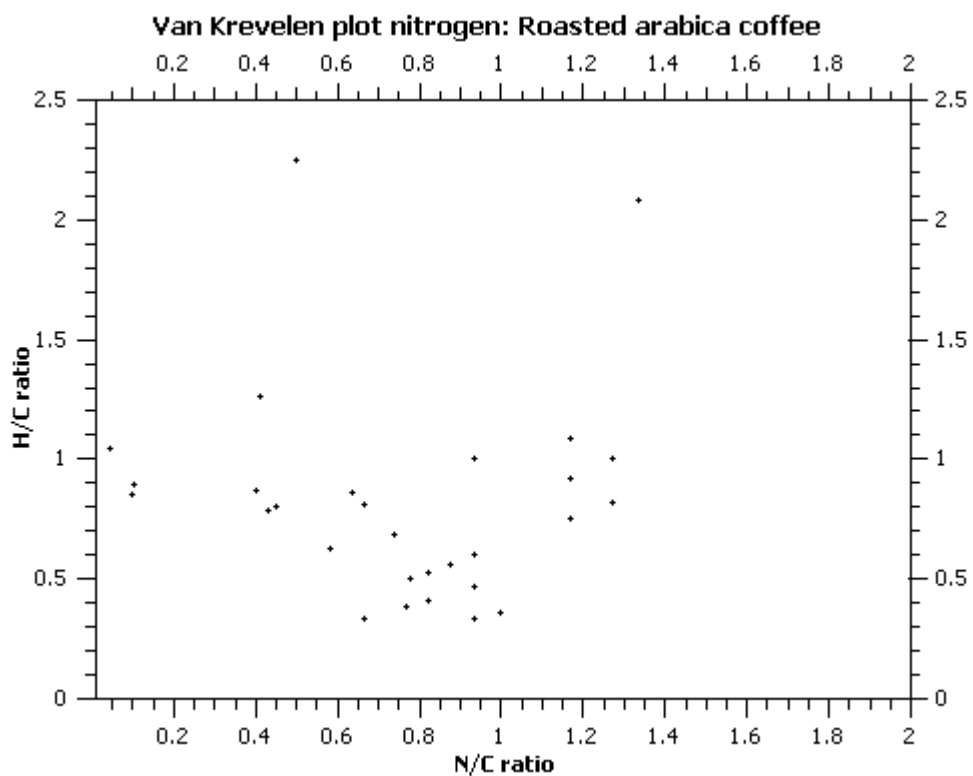

**Figure 3:** Van Krevelen diagrams obtained from ESI-FT-ICR-MS data in the negative ion mode of unique molecular formulas not found in CGA and carbohydrate model roasts from the 300 most intense signals of a) H/C versus O/C diagram of a roasted Arabica coffee melanoidine fraction; b) H/C versus O/C diagram of a roasted Robusta coffee melanoidine fraction; c) H/C versus N/C diagram of a roasted Arabica coffee melanoidine fraction (57 signals only)

#### 4. Molecular formula table of chlorogenic acid model roast

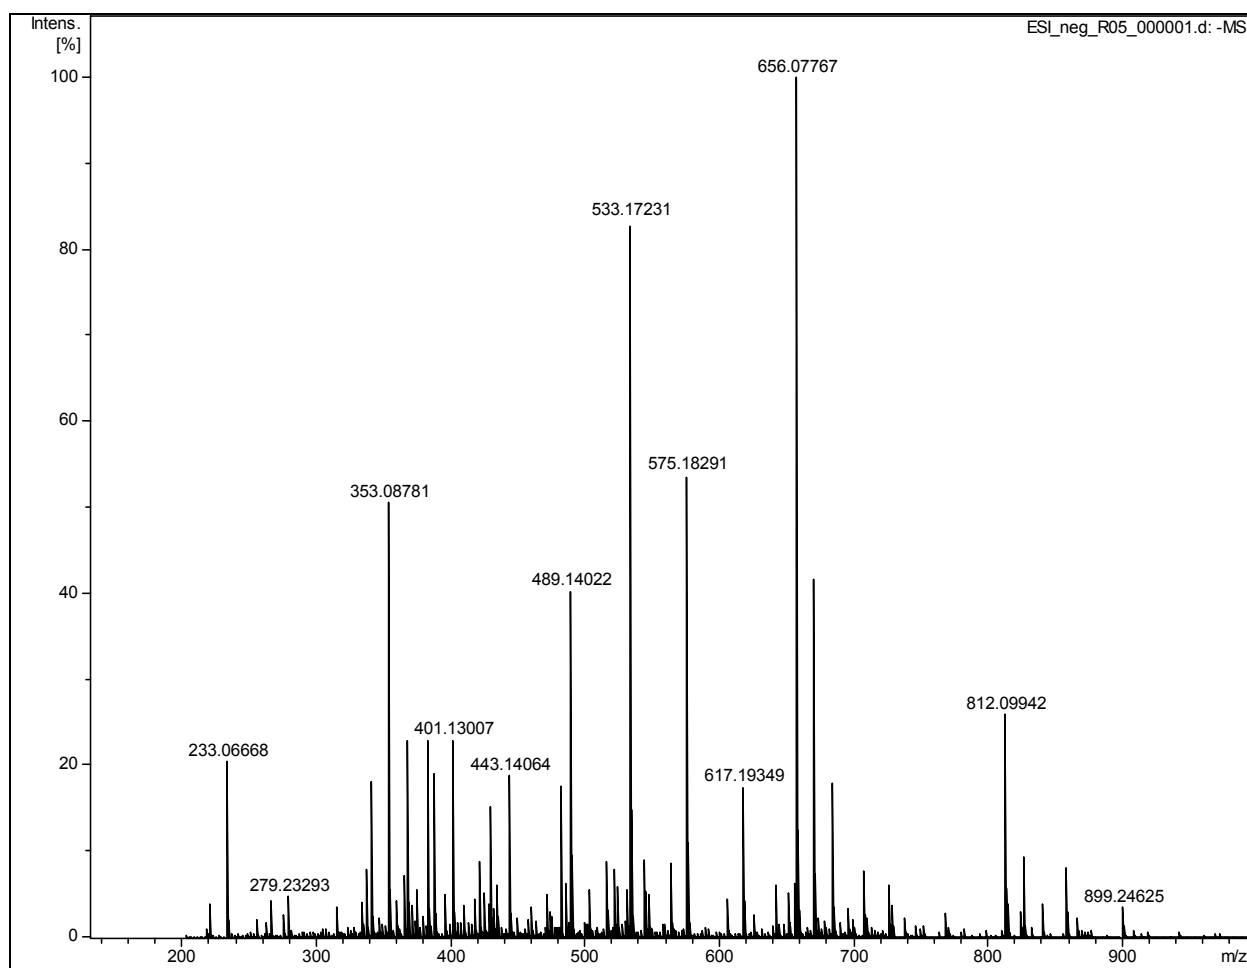

**Figure 4:** Experimental FT-ICR MS spectrum of direct infusion in negative ion mode of Robusta coffee chlorogenic acid fraction model roast

**Table 3:** Experimental FT-ICR MS data of direct infusion in negative ion mode of Robusta coffee chlorogenic acid fraction model roast

| Meas.<br>m/z | # | Formula | Score | m/z       | err<br>[ppm] | Mean<br>err<br>[ppm] |
|--------------|---|---------|-------|-----------|--------------|----------------------|
| 233.06668    |   |         |       | 233.06668 |              |                      |
| 279.23293    |   |         |       | 279.23293 |              |                      |
| 353.08781    |   |         |       | 353.08781 |              |                      |
| 401.13007    |   |         |       | 401.13007 |              |                      |
| 443.14064    |   |         |       | 443.14064 |              |                      |
| 489.14022    |   |         |       | 489.14022 |              |                      |
| 533.17231    |   |         |       | 533.17231 |              |                      |
| 575.18291    |   |         |       | 575.18291 |              |                      |
| 617.19349    |   |         |       | 617.19349 |              |                      |
| 656.07767    |   |         |       | 656.07767 |              |                      |
| 812.09942    |   |         |       | 812.09942 |              |                      |
| 899.24625    |   |         |       | 899.24625 |              |                      |

|          |   |                                 |       |          |      |      |
|----------|---|---------------------------------|-------|----------|------|------|
| 221.0667 | 1 | C 8 H 13 O 7                    | 100   | 221.0667 | 0    | 0    |
| 233.0667 | 1 | C 9 H 13 O 7                    | 100   | 233.0667 | 0    | 0    |
| 241.2173 | 1 | C 15 H 29 O 2                   | 100   | 241.2173 | -0.1 | -0.1 |
| 249.0769 | 1 | C 13 H 13 O 5                   | 100   | 249.0769 | -0.1 | -0.1 |
| 253.0718 | 1 | C 12 H 13 O 6                   | 100   | 253.0718 | 0    | 0    |
| 253.2173 | 1 | C 16 H 29 O 2                   | 100   | 253.2173 | 0    | 0    |
| 255.233  | 1 | C 16 H 31 O 2                   | 100   | 255.233  | 0    | 0    |
| 263.0772 | 1 | C 10 H 15 O 8                   | 100   | 263.0772 | 0    | 0    |
| 273.0768 | 1 | C 15 H 13 O 5                   | 100   | 273.0769 | 0    | 0.1  |
| 275.0772 | 1 | C 11 H 15 O 8                   | 100   | 275.0772 | 0    | 0.1  |
| 275.0925 | 1 | C 15 H 15 O 5                   | 100   | 275.0925 | 0.1  | 0.1  |
| 275.1136 | 1 | C 12 H 19 O 7                   | 100   | 275.1136 | 0.1  | 0.1  |
| 279.2329 | 1 | C 18 H 31 O 2                   | 100   | 279.233  | 0.1  | 0.1  |
| 287.0925 | 1 | C 16 H 15 O 5                   | 100   | 287.0925 | 0    | -0.1 |
| 289.0717 | 1 | C 15 H 13 O 6                   | 100   | 289.0718 | 0.1  | 0.1  |
| 291.0874 | 1 | C 15 H 15 O 6                   | 100   | 291.0874 | -0.1 | -0.1 |
| 305.0667 | 1 | C 15 H 13 O 7                   | 100   | 305.0667 | 0    | 0.1  |
| 307.0823 | 1 | C 15 H 15 O 7                   | 100   | 307.0823 | 0.1  | 0.1  |
| 307.1034 | 1 | C 12 H 19 O 9                   | 100   | 307.1035 | 0.1  | 0    |
| 315.0874 | 1 | C 17 H 15 O 6                   | 100   | 315.0874 | 0.1  | 0.1  |
| 319.1187 | 1 | C 17 H 19 O 6                   | 100   | 319.1187 | 0    | 0.2  |
| 321.098  | 1 | C 16 H 17 O 7                   | 100   | 321.098  | 0    | 0    |
| 323.0983 | 1 | C 10 H 7 N 14                   | 100   | 323.0984 | 0.1  | 0.1  |
| 333.098  | 1 | C 17 H 17 O 7                   | 100   | 333.098  | -0.1 | -0.1 |
| 333.2071 | 1 | C 20 H 29 O 4                   | 100   | 333.2071 | 0    | 0    |
| 334.0876 | 1 | C 8 H 8 N 13 O<br>3             | 100   | 334.0879 | 0.7  | 0.7  |
| 335.0983 | 1 | C 11 H 7 N 14                   | 100   | 335.0984 | 0.2  | 0.1  |
| 335.2228 | 1 | C 20 H 31 O 4                   | 100   | 335.2228 | 0    | 0.1  |
| 337.0929 | 1 | C 16 H 17 O 8                   | 100   | 337.0929 | 0    | 0    |
| 337.114  | 1 | C 11 H 9 N 14                   | 100   | 337.114  | 0    | -0.1 |
| 339.1085 | 1 | C 16 H 19 O 8                   | 100   | 339.1085 | 0.1  | 0    |
| 341.0667 | 1 | C 18 H 13 O 7                   | 100   | 341.0667 | 0    | 0    |
| 341.1089 | 1 | C 12 H 21 O 11<br>C 10 H 9 N 14 | 100   | 341.1089 | 0    | 0    |
| 341.1089 | 2 | O                               | 81.93 | 341.1089 | 0    | -0.2 |
| 349.202  | 1 | C 20 H 29 O 5                   | 100   | 349.2021 | 0.1  | 0    |
| 353.1089 | 1 | C 13 H 21 O 11<br>C 11 H 9 N 14 | 100   | 353.1089 | 0    | 0    |
| 353.1089 | 2 | O                               | 79.15 | 353.1089 | 0    | 0    |
| 355.1034 | 1 | C 16 H 19 O 9<br>C 11 H 11 N 14 | 100   | 355.1035 | 0    | 0    |
| 355.1246 | 1 | O                               | 100   | 355.1246 | 0    | -0.2 |
| 357.098  | 1 | C 19 H 17 O 7                   | 100   | 357.098  | 0    | 0    |
| 359.0772 | 1 | C 18 H 15 O 8                   | 100   | 359.0772 | 0    | -0.1 |
| 365.1089 | 1 | C 14 H 21 O 11<br>C 12 H 9 N 14 | 100   | 365.1089 | 0    | 0    |
| 365.1089 | 2 | O                               | 78.56 | 365.1089 | 0    | 0    |

|          |   |                |       |          |      |      |
|----------|---|----------------|-------|----------|------|------|
| 367.1035 | 1 | C 17 H 19 O 9  | 100   | 367.1035 | 0    | 0    |
| 371.1195 | 1 | C 13 H 23 O 12 | 100   | 371.1195 | 0    | 0    |
|          |   | C 11 H 11 N 14 |       |          |      |      |
|          | 2 | O 2            | 75.78 | 371.1195 | -0.1 | 0    |
| 373.1351 | 1 | C 13 H 25 O 12 | 100   | 373.1352 | 0    | 0    |
| 379.1035 | 1 | C 18 H 19 O 9  | 100   | 379.1035 | 0    | -0.1 |
| 381.101  | 1 | C 8 H 5 N 20   | 100   | 381.1012 | 0.4  | 0.2  |
|          |   | C 10 H 17 N 6  |       |          |      |      |
|          | 2 | O 10           | 93.21 | 381.1012 | 0.5  | 0.3  |
| 383.1195 | 1 | C 14 H 23 O 12 | 100   | 383.1195 | -0.1 | -0.1 |
|          |   | C 12 H 11 N 14 |       |          |      |      |
|          | 2 | O 2            | 80.26 | 383.1195 | -0.1 | -0.2 |
| 385.114  | 1 | C 15 H 9 N 14  | 100   | 385.114  | -0.1 | -0.2 |
| 387.1087 | 1 | C 20 H 19 O 8  | 100   | 387.1085 | -0.4 | -0.3 |
| 387.1144 | 1 | C 13 H 23 O 13 | 100   | 387.1144 | 0    | 0    |
|          |   | C 11 H 11 N 14 |       |          |      |      |
|          | 2 | O 3            | 85.8  | 387.1144 | -0.1 | -0.2 |
| 395.0984 | 1 | C 18 H 19 O 10 | 100   | 395.0984 | 0    | 0    |
|          | 2 | C 16 H 7 N 14  | 85.29 | 395.0984 | 0    | -0.1 |
| 395.1167 | 1 | C 9 H 7 N 20   | 100   | 395.1168 | 0.4  | -0.2 |
|          |   | C 13 H 11 N 14 |       |          |      |      |
| 395.1195 | 1 | O 2            | 100   | 395.1195 | -0.1 | 0    |
|          | 2 | C 15 H 23 O 12 | 92.98 | 395.1195 | 0    | 0.1  |
| 399.1297 | 1 | C 16 H 11 N 14 | 100   | 399.1297 | -0.2 | -0.3 |
| 401.1301 | 1 | C 14 H 25 O 13 | 100   | 401.1301 | 0    | 0    |
| 405.1015 | 1 | C 10 H 5 N 20  | 100   | 405.1012 | -0.8 | -0.9 |
| 409.114  | 1 | C 19 H 21 O 10 | 100   | 409.114  | 0    | 0    |
|          |   | C 13 H 13 N 14 |       |          |      |      |
| 413.1301 | 1 | O 3            | 100   | 413.1301 | -0.1 | -0.2 |
|          |   | C 16 H 11 N 14 |       |          |      |      |
| 415.1245 | 1 | O              | 100   | 415.1246 | 0.1  | -0.1 |
|          |   | C 13 H 15 N 14 |       |          |      |      |
| 415.1457 | 1 | O 3            | 100   | 415.1457 | -0.1 | -0.2 |
| 417.125  | 1 | C 14 H 25 O 14 | 100   | 417.125  | 0    | 0    |
|          |   | C 8 H 7 N 16 O |       |          |      |      |
| 423.0735 | 1 | 6              | 100   | 423.074  | 1.1  | 1    |
| 425.1301 | 1 | C 16 H 25 O 13 | 100   | 425.1301 | 0    | 0    |
|          |   | C 15 H 17 N 14 |       |          |      |      |
| 425.1664 | 1 | O 2            | 100   | 425.1664 | 0    | -0.1 |
|          |   | C 10 H 14 N 13 |       |          |      |      |
| 428.1142 | 1 | O 7            | 100   | 428.1145 | 0.5  | 0    |
| 429.125  | 1 | C 15 H 25 O 14 | 100   | 429.125  | 0    | 0    |
|          |   | C 3 H 7 N 22 O |       |          |      |      |
| 431.0983 | 1 | 5              | 100   | 431.0975 | -1.9 | -1.9 |
|          |   | C 4 H 11 N 22  |       |          |      |      |
| 431.1347 | 1 | O 4            | 87.7  | 431.1339 | -1.9 | -1.3 |
| 431.1406 | 1 | C 15 H 27 O 14 | 100   | 431.1406 | 0    | 0    |
|          |   | C 13 H 15 N 14 |       |          |      |      |
|          | 2 | O 4            | 81.21 | 431.1406 | 0    | 0    |

|          |   |                                  |       |          |      |      |
|----------|---|----------------------------------|-------|----------|------|------|
| 437.1242 | 1 | C 6 H 9 N 22 O<br>3              | 100   | 437.1234 | -1.9 | -1.3 |
| 437.1301 | 1 | C 15 H 13 N 14<br>O 3            | 100   | 437.1301 | 0    | 0    |
| 439.1246 | 1 | C 18 H 11 N 14<br>O              | 100   | 439.1246 | -0.1 | -0.2 |
| 441.1191 | 1 | C 5 H 9 N 22 O<br>4              | 100   | 441.1183 | -1.9 | -1.5 |
| 443.1406 | 1 | C 16 H 27 O 14                   | 100   | 443.1406 | 0    | 0    |
| 445.033  | 1 | C 8 H N 18 O 6<br>C 4 H 9 N 22 O | 100   | 445.0332 | 0.5  | 0.3  |
| 445.114  | 1 | 5                                | 100   | 445.1132 | -1.9 | -2.7 |
| 447.1296 | 1 | C 4 H 11 N 22<br>O 5             | 96.24 | 447.1288 | -1.8 | -1.8 |
| 451.086  | 1 | C 14 H 3 N 20<br>C 19 H 13 N 14  | 100   | 451.0855 | -1   | -1.2 |
| 453.1403 | 1 | O                                | 100   | 453.1402 | -0.1 | -0.2 |
| 461.1512 | 1 | C 14 H 17 N 14<br>O 5            | 100   | 461.1512 | 0    | -0.1 |
| 463.1246 | 1 | C 22 H 23 O 11<br>C 7 H 11 N 22  | 100   | 463.1246 | -0.1 | -0.1 |
| 467.1348 | 1 | O 4                              | 100   | 467.1339 | -1.8 | -2.5 |
| 467.1406 | 1 | C 16 H 15 N 14<br>O 4            | 100   | 467.1406 | 0    | -0.2 |
| 469.114  | 1 | C 7 H 5 N 26 O<br>C 6 H 9 N 22 O | 100   | 469.1145 | 1.1  | 0.3  |
| 470.1516 | 2 | 5                                | 82.65 | 469.1132 | -1.8 | -2.6 |
| 471.1356 | 1 | C 17 H 28 N O<br>14              | 100   | 470.1515 | -0.1 | 0.1  |
| 471.1356 | 1 | C 17 H 27 O 15<br>C 15 H 15 N 14 | 100   | 471.1355 | -0.1 | 0.1  |
| 473.1453 | 2 | O 5                              | 95.34 | 471.1355 | -0.1 | 0    |
| 473.1453 | 1 | C 6 H 13 N 22<br>O 5             | 100   | 473.1445 | -1.8 | -1.2 |
| 478.1567 | 1 | C 19 H 28 N O<br>13              | 100   | 478.1566 | -0.1 | 0.1  |
| 479.1195 | 1 | C 4 H 11 N 22<br>O 7             | 74.69 | 479.1187 | -1.8 | -1.8 |
| 479.1559 | 1 | C 6 H 11 N 26<br>O 2             | 100   | 479.1564 | 0.9  | 1.6  |
| 481.2443 | 1 | C 25 H 37 O 9                    | 100   | 481.2443 | 0    | 0    |
| 485.0688 | 1 | C H N 28 O 5<br>C 16 H 17 N 14   | 100   | 485.069  | 0.5  | -0.1 |
| 485.1512 | 1 | O 5                              | 100   | 485.1512 | 0    | 0    |
| 485.1512 | 2 | C 18 H 29 O 15<br>C 4 H 11 N 26  | 95.51 | 485.1512 | 0    | 0.1  |
| 487.1458 | 1 | O 4                              | 100   | 487.1462 | 0.9  | 0.9  |
| 489.1402 | 1 | C 24 H 25 O 11                   | 100   | 489.1402 | 0    | 0    |
| 503.1559 | 1 | C 25 H 27 O 11                   | 100   | 503.1559 | 0    | 0    |
| 503.1618 | 1 | C 16 H 19 N 14                   | 100   | 503.1618 | -0.1 | 0    |

|          |   | O 6            |       |          |      |      |
|----------|---|----------------|-------|----------|------|------|
|          | 2 | C 18 H 31 O 16 | 91.45 | 503.1618 | 0    | 0.1  |
| 517.1774 | 1 | C 19 H 33 O 16 | 100   | 517.1774 | 0    | 0    |
| 521.1723 | 1 | C 18 H 33 O 17 | 100   | 521.1723 | 0    | 0    |
|          |   | C 16 H 21 N 14 |       |          |      |      |
|          | 2 | O 7            | 89.69 | 521.1723 | -0.1 | -0.1 |
| 523.2549 | 1 | C 25 H 27 N 14 | 100   | 523.2549 | 0    | -0.1 |
|          | 2 | C 27 H 39 O 10 | 97.2  | 523.2549 | 0    | 0    |
| 533.1301 | 1 | C 25 H 25 O 13 | 100   | 533.1301 | 0    | 0    |
|          |   | C 10 H 20 N 19 |       |          |      |      |
| 534.1757 | 1 | O 8            | 100   | 534.1748 | -1.7 | -1.1 |
|          |   | C 6 H 15 N 22  |       |          |      |      |
| 539.1407 | 1 | O 9            | 87.14 | 539.1398 | -1.6 | -1.6 |
|          |   | C 7 H 11 N 26  |       |          |      |      |
|          | 2 | O 5            | 100   | 539.1411 | 0.9  | 0.9  |
|          |   | C 7 H 13 N 26  |       |          |      |      |
| 541.1562 | 1 | O 5            | 100   | 541.1568 | 1    | 0.9  |
|          |   | C 6 H 17 N 22  |       |          |      |      |
|          | 2 | O 9            | 77.36 | 541.1554 | -1.5 | -1.6 |
|          |   | C 12 H 15 N 8  |       |          |      |      |
| 543.0563 | 1 | O 17           | 100   | 543.0561 | -0.4 | -0.3 |
| 545.0531 | 1 | C 2 H N 28 O 8 | 100   | 545.0538 | 1.2  | 0.7  |
|          |   | C 6 H 17 N 26  |       |          |      |      |
| 549.1825 | 1 | O 6            | 95.16 | 549.183  | 1    | 1    |
| 563.1829 | 1 | C 20 H 35 O 18 | 100   | 563.1829 | 0    | 0    |
|          |   | C 11 H 23 N 26 |       |          |      |      |
| 567.2447 | 1 | O 3            | 100   | 567.2452 | 0.9  | 0.7  |
|          |   | C 12 H 22 N 19 |       |          |      |      |
| 576.1863 | 1 | O 9            | 100   | 576.1853 | -1.6 | -1.1 |
|          |   | C 7 H 17 N 26  |       |          |      |      |
| 577.1774 | 1 | O 7            | 100   | 577.1779 | 1    | 0.9  |
|          |   | C 12 H 11 N 26 |       |          |      |      |
| 583.1457 | 1 | O 4            | 100   | 583.1462 | 0.8  | 0.6  |
|          |   | C 7 H 19 N 22  |       |          |      |      |
| 587.1618 | 1 | O 11           | 85.08 | 587.1609 | -1.4 | -1.4 |
|          |   | C 8 H 15 N 26  |       |          |      |      |
|          | 2 | O 7            | 100   | 587.1623 | 0.8  | 0.8  |
| 605.1512 | 1 | C 8 H 5 N 36   | 100   | 605.1503 | -1.4 | -1.4 |
| 617.1935 | 1 | C 23 H 37 O 19 | 100   | 617.1935 | -0.1 | 0    |
| 641.0906 | 1 | C 15 H 29 O 27 | 100   | 641.0902 | -0.6 | -0.5 |
| 647.204  | 1 | C 24 H 39 O 20 | 100   | 647.204  | 0.1  | -0.1 |
| 657.0811 | 1 | C 7 H N 34 O 6 | 100   | 657.0824 | 2    | 1.5  |
| 658.0745 | 1 | C N 37 O 8     | 86.74 | 658.0736 | -1.4 | -1.8 |
|          |   | C 4 H 8 N 27 O |       |          |      |      |
|          | 2 | 14             | 100   | 658.075  | 0.7  | 0.3  |
|          |   | C 15 H 24 N 5  |       |          |      |      |
| 658.0825 | 1 | O 24           | 100   | 658.0817 | -1.3 | -1.5 |
|          |   | C 3 H 5 N 42 O |       |          |      |      |
| 661.1599 | 1 | 2              | 62.81 | 661.1586 | -1.9 | -2.2 |

|          |   |                |       |          |      |      |
|----------|---|----------------|-------|----------|------|------|
|          |   | C 9 H 8 N 27 O |       |          |      |      |
| 670.0889 | 1 | 11             | 100   | 670.0902 | 2    | 1.6  |
|          |   | C 6 H 16 N 37  |       |          |      |      |
| 670.22   | 1 | O 4            | 95.68 | 670.2192 | -1.3 | -1.8 |
|          |   | C 6 H 15 N 20  |       |          |      |      |
| 671.0823 | 1 | O 19           | 100   | 671.0828 | 0.7  | 0.3  |
|          |   | C 4 H 3 N 34 O |       |          |      |      |
|          | 2 | 9              | 96.02 | 671.0828 | 0.7  | 0.3  |
|          |   | C 8 H 13 N 36  |       |          |      |      |
| 677.1935 | 1 | O 4            | 94.63 | 677.1926 | -1.3 | -1.3 |
| 683.2252 | 1 | C 24 H 43 O 22 | 100   | 683.2252 | -0.1 | 0    |
| 695.1619 | 1 | C 34 H 31 O 16 | 100   | 695.1618 | -0.2 | -0.1 |
|          |   | C 32 H 19 N 14 |       |          |      |      |
|          | 2 | O 6            | 98.36 | 695.1618 | -0.2 | -0.2 |
|          |   | C 35 H 27 N 4  |       |          |      |      |
|          | 3 | O 12           | 53.15 | 695.1631 | 1.7  | 1.8  |
|          |   | C 26 H 39 N 4  |       |          |      |      |
| 695.2252 | 1 | O 18           | 51.01 | 695.2265 | 1.9  | 1.7  |
|          |   | C 23 H 31 N 14 |       |          |      |      |
|          | 2 | O 12           | 100   | 695.2251 | 0    | -0.3 |
|          |   | C 8 H 17 N 36  |       |          |      |      |
| 697.2197 | 1 | O 5            | 92.84 | 697.2188 | -1.3 | -1.3 |
|          |   | C 7 H 15 N 20  |       |          |      |      |
| 699.0781 | 1 | O 20           | 100   | 699.0777 | -0.6 | -0.6 |
|          |   | C 10 H 23 N 10 |       |          |      |      |
|          | 2 | O 26           | 67.27 | 699.079  | 1.4  | 1.4  |
|          |   | C 23 H 37 N 10 |       |          |      |      |
| 725.2357 | 1 | O 17           | 54.83 | 725.2344 | -1.8 | -1.9 |
|          |   | C 33 H 47 N 10 |       |          |      |      |
| 727.3546 | 1 | O 9            | 58.43 | 727.3533 | -1.9 | -1.9 |
|          |   | C 28 H 25 N 4  |       |          |      |      |
| 769.0964 | 1 | O 22           | 100   | 769.0966 | 0.3  | 0.4  |
|          |   | C 35 H 49 N 10 |       |          |      |      |
| 769.3652 | 1 | O 10           | 53.14 | 769.3639 | -1.7 | -1.7 |
|          | 2 | C 33 H 37 N 24 | 52.4  | 769.3639 | -1.7 | -1.8 |
|          |   | C 36 H 45 N 14 |       |          |      |      |
|          | 3 | O 6            | 100   | 769.3652 | 0    | 0    |
|          | 4 | C 38 H 57 O 16 | 92.1  | 769.3652 | 0    | 0.1  |
|          |   | C 39 H 53 N 4  |       |          |      |      |
|          | 5 | O 12           | 44.17 | 769.3666 | 1.8  | 1.8  |
|          |   | C 8 H 6 N 37 O |       |          |      |      |
| 812.0994 | 1 | 12             | 100   | 812.1002 | 1    | 0.6  |
|          |   | C 10 H 18 N 23 |       |          |      |      |
|          | 2 | O 22           | 86.44 | 812.1002 | 1    | 0.9  |
|          |   | C 7 H 10 N 33  |       |          |      |      |
|          | 3 | O 16           | 95.67 | 812.0989 | -0.7 | -1   |
|          |   | C 9 H 22 N 19  |       |          |      |      |
|          | 4 | O 26           | 94.23 | 812.0989 | -0.7 | -0.7 |
|          |   | C 9 H 17 N 26  |       |          |      |      |
| 825.1073 | 1 | O 21           | 100   | 825.1067 | -0.7 | -0.8 |

|          |   |                |       |          |      |      |
|----------|---|----------------|-------|----------|------|------|
|          |   | C 10 H 13 N 30 |       |          |      |      |
|          | 2 | O 17           | 90.13 | 825.108  | 0.9  | 0.6  |
|          | 3 | C 8 H N 44 O 7 | 87.97 | 825.108  | 0.9  | 0.5  |
|          |   | C 12 H 25 N 16 |       |          |      |      |
|          | 4 | O 27           | 84.85 | 825.1081 | 0.9  | 0.9  |
|          |   | C 11 H 15 N 30 |       |          |      |      |
| 839.123  | 1 | O 17           | 100   | 839.1237 | 0.8  | 0.8  |
|          |   | C 8 H 7 N 40 O |       |          |      |      |
|          | 2 | 11             | 93.48 | 839.1223 | -0.8 | -1.1 |
|          |   | C 9 H 3 N 44 O |       |          |      |      |
|          | 3 | 7              | 87.43 | 839.1237 | 0.8  | 0.3  |
|          |   | C 10 H 19 N 26 |       |          |      |      |
|          | 4 | O 21           | 85.74 | 839.1224 | -0.8 | -0.8 |
|          |   | C 13 H 27 N 16 |       |          |      |      |
|          | 5 | O 27           | 79.42 | 839.1237 | 0.8  | 0.8  |
|          |   | C 38 H 33 N 10 |       |          |      |      |
| 869.2145 | 1 | O 15           | 63.18 | 869.2132 | -1.5 | -1.5 |

5. Molecular formula table of coffee melanoidines

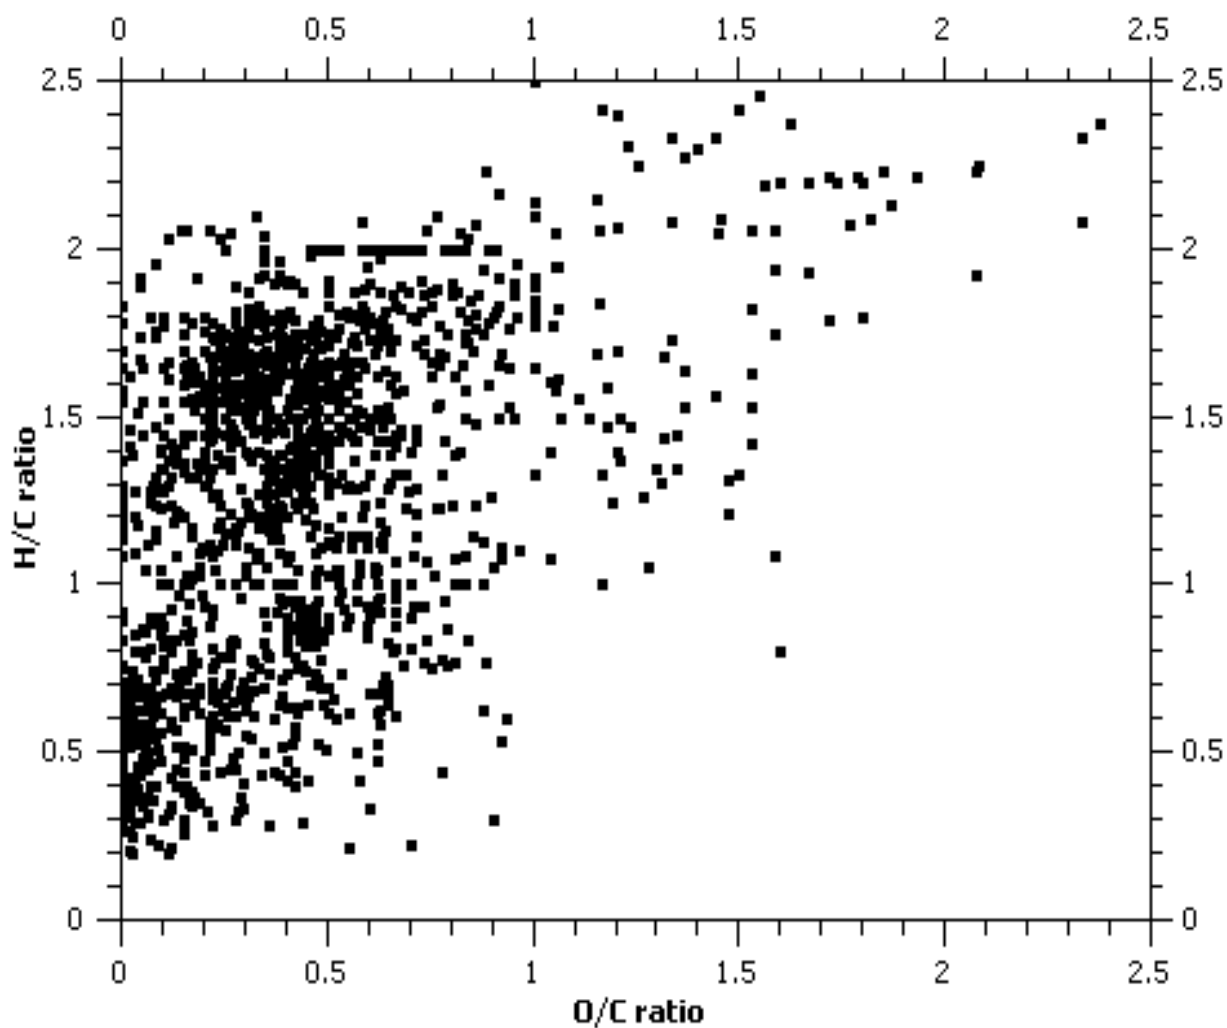



**Figure 5:** Van Krevelen diagram of 500 most intense ions from FT-ICR MS data in negative ion mode of roasted coffee melanoidines purified by dialysis

**Table 4:** Experimental FT-ICR MS data of direct infusion in negative ion mode of Robusta coffee melanoidines purified by dialysis

| Meas.<br>m/z | # | Formula        | Score | m/z      | err<br>[ppm] | Mean<br>err<br>[ppm] | mSigma |
|--------------|---|----------------|-------|----------|--------------|----------------------|--------|
| 225.0616     | 1 | C 7 H 13 O 8   | 100   | 225.0616 | -0.1         | 0                    | 16.5   |
| 227.2017     | 1 | C 14 H 27 O 2  | 100   | 227.2017 | -0.1         | -0.1                 | 15.4   |
| 251.0772     | 1 | C 9 H 15 O 8   | 100   | 251.0772 | 0            | 0                    | 15.5   |
| 269.2486     | 1 | C 17 H 33 O 2  | 100   | 269.2486 | 0            | 0                    | 13.1   |
| 283.2643     | 1 | C 18 H 35 O 2  | 100   | 283.2643 | 0            | 0                    | 17     |
| 287.0772     | 1 | C 12 H 15 O 8  | 100   | 287.0772 | 0            | 0                    | 15.6   |
| 297.2435     | 1 | C 18 H 33 O 3  | 100   | 297.2435 | 0            | 0                    | 14.4   |
| 315.0721     | 1 | C 13 H 15 O 9  | 100   | 315.0722 | 0.1          | 0.1                  | 18.7   |
| 323.0984     | 1 | C 12 H 19 O 10 | 100   | 323.0984 | 0            | 0                    | 5.2    |
|              | 2 | C 10 H 7 N 14  | 82.08 | 323.0984 | 0            | -0.1                 | 15.9   |
| 333.0827     | 1 | C 13 H 17 O 10 | 100   | 333.0827 | 0            | 0                    | 11.1   |
| 341.1089     | 1 | C 12 H 21 O 11 | 100   | 341.1089 | 0.1          | 0.1                  | 3.4    |
|              |   | C 10 H 9 N 14  |       |          |              |                      |        |
|              | 2 | O              | 82.84 | 341.1089 | 0            | -0.1                 | 14     |
| 351.0933     | 1 | C 13 H 19 O 11 | 100   | 351.0933 | 0            | 0                    | 19.2   |
|              |   | C 10 H 11 N 14 |       |          |              |                      |        |
| 359.1195     | 1 | O 2            | 100   | 359.1195 | -0.1         | -0.2                 | 10.6   |
|              |   | C 12 H 7 N 14  |       |          |              |                      |        |
| 363.0933     | 1 | O              | 100   | 363.0933 | 0            | -0.1                 | 8.4    |
| 369.1038     | 1 | C 13 H 21 O 12 | 100   | 369.1039 | 0            | 0                    | 9.9    |
| 377.1089     | 1 | C 15 H 21 O 11 | 100   | 377.1089 | 0.1          | 0.1                  | 9.5    |
|              |   | C 12 H 11 N 14 |       |          |              |                      |        |
| 383.1194     | 1 | O 2            | 100   | 383.1195 | 0.1          | 0                    | 11.4   |
| 387.1144     | 1 | C 13 H 23 O 13 | 100   | 387.1144 | 0            | 0                    | 5.3    |
|              |   | C 11 H 11 N 14 |       |          |              |                      |        |
|              | 2 | O 3            | 78.65 | 387.1144 | 0            | -0.1                 | 18.1   |
| 399.1144     | 1 | C 14 H 23 O 13 | 100   | 399.1144 | 0.1          | 0.1                  | 9.1    |
| 401.1301     | 1 | C 14 H 25 O 13 | 100   | 401.1301 | 0            | 0.1                  | 19.2   |
|              |   | C 13 H 11 N 14 |       |          |              |                      |        |
| 411.1144     | 1 | O 3            | 100   | 411.1144 | 0            | 0                    | 16.3   |
|              |   | C 16 H 9 N 14  |       |          |              |                      |        |
| 413.1089     | 1 | O              | 100   | 413.1089 | 0            | -0.1                 | 13.8   |
| 413.1301     | 1 | C 15 H 25 O 13 | 100   | 413.1301 | 0            | 0                    | 7.5    |
| 417.125      | 1 | C 14 H 25 O 14 | 100   | 417.125  | 0            | 0                    | 8.1    |
|              |   | C 12 H 13 N 14 |       |          |              |                      |        |
|              | 2 | O 4            | 92.9  | 417.125  | 0            | -0.1                 | 12.3   |
| 431.1195     | 1 | C 18 H 23 O 12 | 100   | 431.1195 | 0            | -0.1                 | 5.2    |
|              |   | C 16 H 11 N 14 |       |          |              |                      |        |
|              | 2 | O 2            | 76.87 | 431.1195 | 0            | -0.1                 | 19.1   |
| 431.1406     | 1 | C 13 H 15 N 14 | 100   | 431.1406 | 0            | 0.1                  | 8      |

|          |   |                                  |       |          |      |      |      |
|----------|---|----------------------------------|-------|----------|------|------|------|
|          |   | O 4                              |       |          |      |      |      |
|          | 2 | C 15 H 27 O 14<br>C 10 H 5 N 20  | 94.66 | 431.1406 | 0.1  | 0.1  | 10.8 |
| 437.0913 | 1 | O 2<br>C 14 H 15 N 14            | 100   | 437.091  | -0.7 | -0.8 | 18.3 |
| 443.1406 | 1 | O 4                              | 100   | 443.1406 | 0.1  | 0    | 16.1 |
| 449.1301 | 1 | C 18 H 25 O 13<br>C 16 H 13 N 14 | 100   | 449.1301 | 0    | 0    | 7.8  |
|          | 2 | O 3<br>C 10 H 7 N 20             | 94.51 | 449.1301 | -0.1 | 0    | 10.7 |
| 455.1018 | 1 | O 3<br>C 11 H 15 N 2             | 100   | 455.1016 | -0.6 | -0.8 | 19.9 |
| 463.0325 | 1 | O 18<br>C 16 H 13 N 14           | 100   | 463.0325 | 0.1  | 0.3  | 4.8  |
| 465.125  | 1 | O 4                              | 100   | 465.125  | 0    | -0.1 | 18.4 |
| 467.1406 | 1 | C 18 H 27 O 14                   | 100   | 467.1406 | 0    | 0    | 9.6  |
| 477.125  | 1 | C 19 H 25 O 14<br>C 19 H 11 N 16 | 100   | 477.125  | 0    | 0    | 13.4 |
| 479.1316 | 1 | O                                | 94.79 | 479.1307 | -1.9 | -1   | 18.6 |
| 485.1512 | 1 | C 18 H 29 O 15                   | 100   | 485.1512 | 0    | 0    | 12.3 |
| 495.1356 | 1 | C 19 H 27 O 15<br>C 17 H 15 N 14 | 100   | 495.1355 | 0    | 0    | 10.1 |
|          | 2 | O 5                              | 84.21 | 495.1355 | 0    | -0.1 | 18.6 |
| 503.1618 | 1 | C 18 H 31 O 16<br>C 16 H 19 N 14 | 100   | 503.1618 | 0    | 0    | 12.2 |
|          | 2 | O 6                              | 93.98 | 503.1618 | 0    | -0.1 | 15.2 |
| 507.1356 | 1 | C 20 H 27 O 15                   | 100   | 507.1355 | 0    | 0    | 13.5 |
| 513.0637 | 1 | C 2 H N 28 O 6                   | 100   | 513.0639 | 0.5  | -0.1 | 19   |
| 513.1461 | 1 | C 19 H 29 O 16                   | 100   | 513.1461 | 0    | 0    | 12.1 |
| 521.1723 | 1 | C 18 H 33 O 17<br>C 16 H 21 N 14 | 100   | 521.1723 | 0    | 0    | 11.8 |
|          | 2 | O 7                              | 90.86 | 521.1723 | 0    | -0.1 | 16.8 |
| 531.1567 | 1 | C 19 H 31 O 17                   | 100   | 531.1567 | 0    | 0    | 14   |
| 545.0531 | 1 | C 2 H N 28 O 8                   | 100   | 545.0538 | 1.2  | 0.7  | 11.3 |
| 549.1673 | 1 | C 19 H 33 O 18<br>C 17 H 21 N 14 | 100   | 549.1672 | 0    | 0    | 12.8 |
|          | 2 | O 8                              | 91.16 | 549.1672 | 0    | -0.1 | 17.2 |
| 561.1673 | 1 | C 20 H 33 O 18<br>C 18 H 21 N 14 | 100   | 561.1672 | 0    | 0    | 11.8 |
|          | 2 | O 8                              | 89.92 | 561.1672 | -0.1 | -0.1 | 16.9 |
| 575.1829 | 1 | C 21 H 35 O 18<br>C 19 H 23 N 14 | 100   | 575.1829 | 0    | 0    | 14.1 |
|          | 2 | O 8                              | 89.73 | 575.1829 | 0    | 0    | 19.2 |
| 579.1778 | 1 | O 9                              | 100   | 579.1778 | 0    | -0.1 | 6.6  |
|          | 2 | C 20 H 35 O 19                   | 95.97 | 579.1778 | 0    | 0    | 9.1  |
| 593.1724 | 1 | C 24 H 33 O 17<br>C 4 H 9 N 36 O | 100   | 593.1723 | 0    | 0    | 15.2 |
| 609.1673 | 1 | 3                                | 87.09 | 609.1664 | -1.5 | -1   | 12.4 |

|          |   |                |       |          |      |      |      |  |
|----------|---|----------------|-------|----------|------|------|------|--|
|          |   |                |       |          |      |      |      |  |
|          |   | C 7 H 17 N 26  |       |          |      |      |      |  |
|          | 2 | O 9            | 100   | 609.1677 | 0.7  | 1.2  | 17.5 |  |
|          |   | C 22 H 25 N 14 |       |          |      |      |      |  |
| 629.1934 | 1 | O 9            | 100   | 629.1934 | 0    | 0    | 12.7 |  |
|          |   | C 23 H 23 N 14 |       |          |      |      |      |  |
| 639.1778 | 1 | O 9            | 100   | 639.1778 | 0    | 0    | 19.7 |  |
|          |   | C 3 H 3 N 34 O |       |          |      |      |      |  |
| 643.0875 | 1 | 8              | 100   | 643.0879 | 0.5  | 0.1  | 16.7 |  |
| 658.0745 | 1 | C N 37 O 8     | 100   | 658.0736 | -1.4 | -1.8 | 2.2  |  |
|          |   | C 4 H 8 N 27 O |       |          |      |      |      |  |
|          | 2 | 14             | 98.92 | 658.075  | 0.7  | 0.2  | 16.3 |  |
|          |   | C 9 H 8 N 27 O |       |          |      |      |      |  |
| 670.0889 | 1 | 11             | 100   | 670.0902 | 2    | 1.5  | 18.2 |  |
|          |   | C 4 H 3 N 34 O |       |          |      |      |      |  |
| 671.0824 | 1 | 9              | 100   | 671.0828 | 0.6  | 0.2  | 16.6 |  |
|          |   | C 6 H 15 N 20  |       |          |      |      |      |  |
|          | 2 | O 19           | 96.89 | 671.0828 | 0.6  | 0.2  | 17.9 |  |
|          |   | C 15 H 28 N O  |       |          |      |      |      |  |
| 686.0758 | 1 | 29             | 100   | 686.0753 | -0.7 | -0.6 | 12.6 |  |
|          |   | C 24 H 31 N 12 |       |          |      |      |      |  |
| 695.2136 | 1 | O 13           | 100   | 695.2139 | 0.4  | 0.3  | 9.5  |  |
|          |   | C 21 H 23 N 22 |       |          |      |      |      |  |
|          | 2 | O 7            | 68.17 | 695.2126 | -1.5 | -1.7 | 9.8  |  |
|          |   | C 25 H 27 N 16 |       |          |      |      |      |  |
| 695.2164 | 1 | O 9            | 100   | 695.2152 | -1.7 | -0.6 | 13   |  |
|          |   | C 7 H 15 N 20  |       |          |      |      |      |  |
| 699.0781 | 1 | O 20           | 100   | 699.0777 | -0.5 | -0.5 | 4.2  |  |
|          |   | C 10 H 23 N 10 |       |          |      |      |      |  |
|          | 2 | O 26           | 66.35 | 699.079  | 1.4  | 1.4  | 10   |  |
|          |   | C 22 H 35 N 10 |       |          |      |      |      |  |
| 711.2201 | 1 | O 17           | 55.27 | 711.2187 | -2   | -2   | 17.4 |  |
|          |   | C 20 H 23 N 24 |       |          |      |      |      |  |
|          | 2 | O 7            | 53.79 | 711.2187 | -2   | -2   | 18.4 |  |
|          |   | C 31 H 35 N 4  |       |          |      |      |      |  |
| 719.2041 | 1 | O 16           | 56.42 | 719.2054 | 1.7  | 1.6  | 9.5  |  |
|          |   | C 28 H 27 N 14 |       |          |      |      |      |  |
|          | 2 | O 10           | 100   | 719.204  | -0.1 | -0.3 | 10.3 |  |
|          | 3 | C 30 H 39 O 20 | 93.49 | 719.204  | -0.1 | -0.2 | 14   |  |
|          |   | C 29 H 23 N 18 |       |          |      |      |      |  |
|          | 4 | O 6            | 50.65 | 719.2053 | 1.7  | 1.5  | 15.5 |  |
|          |   | C 26 H 21 N 24 |       |          |      |      |      |  |
| 765.2096 | 1 | O 6            | 55.63 | 765.2081 | -1.8 | -2   | 2.1  |  |
|          |   | C 29 H 29 N 14 |       |          |      |      |      |  |
|          | 2 | O 12           | 100   | 765.2095 | -0.1 | -0.2 | 9    |  |
|          |   | C 30 H 25 N 18 |       |          |      |      |      |  |
|          | 3 | O 8            | 49.41 | 765.2108 | 1.7  | 1.6  | 13.4 |  |
|          |   | C 27 H 17 N 28 |       |          |      |      |      |  |
|          | 4 | O 2            | 90.42 | 765.2095 | -0.1 | -0.2 | 14.1 |  |
|          |   | C 28 H 33 N 10 |       |          |      |      |      |  |
|          | 5 | O 16           | 45.07 | 765.2082 | -1.8 | -1.9 | 14.1 |  |
|          | 6 | C 32 H 37 N 4  | 47.33 | 765.2108 | 1.7  | 1.7  | 15.2 |  |

|          |   |                                  |       |          |      |      |      |
|----------|---|----------------------------------|-------|----------|------|------|------|
|          |   | O 18                             |       |          |      |      |      |
|          | 7 | C 31 H 41 O 22<br>C 5 H N 40 O   | 83.12 | 765.2095 | -0.1 | -0.1 | 18.6 |
| 781.0811 | 1 | 10                               | 100   | 781.0805 | -0.8 | -1.3 | 12.5 |
|          | 2 | C 8 H 9 N 30 O<br>16             | 93.92 | 781.0818 | 0.9  | 0.5  | 12.9 |
|          | 3 | C 10 H 21 N 16<br>O 26           | 92.67 | 781.0818 | 0.9  | 0.9  | 13.3 |
| 797.1124 | 1 | C 11 H 25 N 16<br>O 26           | 98.15 | 797.1131 | 0.9  | 0.9  | 8.3  |
|          | 2 | C 10 H 29 N 12<br>O 30           | 100   | 797.1118 | -0.8 | -0.8 | 10.8 |
|          | 3 | C 6 H 5 N 40 O<br>10             | 98.25 | 797.1118 | -0.8 | -1.2 | 11.1 |
|          | 4 | C 9 H 13 N 30<br>O 16            | 79.69 | 797.1131 | 0.9  | 0.6  | 19.2 |
| 812.0995 | 1 | C 8 H 6 N 37 O<br>12             | 100   | 812.1002 | 0.9  | 0.5  | 6.2  |
|          | 2 | C 10 H 18 N 23<br>O 22           | 95.7  | 812.1002 | 0.9  | 0.9  | 8.3  |
|          | 3 | C 9 H 22 N 19<br>O 26            | 93.07 | 812.0989 | -0.7 | -0.7 | 14.2 |
| 825.1073 | 1 | C 8 H N 44 O 7<br>C 9 H 17 N 26  | 100   | 825.108  | 0.9  | 0.5  | 5.3  |
|          | 2 | O 21<br>C 12 H 25 N 16           | 99.27 | 825.1067 | -0.7 | -0.8 | 8.6  |
|          | 3 | O 27<br>C 10 H 13 N 30           | 84.88 | 825.1081 | 0.9  | 0.9  | 13.6 |
|          | 4 | O 17<br>C 15 H 23 N 16           | 80.05 | 825.108  | 0.9  | 0.5  | 16.8 |
| 827.1041 | 1 | O 25<br>C 32 H 29 N 24           | 54.9  | 827.1026 | -1.8 | -1.8 | 14.3 |
| 909.2518 | 1 | O 10<br>C 34 H 41 N 10           | 55.42 | 909.2504 | -1.5 | -1.4 | 19.7 |
|          | 2 | O 20<br>C 34 H 23 N 32           | 55.69 | 909.2504 | -1.5 | -1.4 | 19.8 |
| 927.2623 | 1 | O 3                              | 62.31 | 927.2636 | 1.4  | 1.3  | 15.9 |
| 1277.405 | 1 | C 25 H 25 N 68<br>C 28 H 33 N 58 | 100   | 1277.405 | 0.5  | 0.1  | 10.2 |
|          | 2 | O 6<br>C 24 H 29 N 64            | 39.85 | 1277.407 | 1.6  | 1.2  | 13.8 |
|          | 3 | O 4<br>C 27 H 37 N 54            | 82.21 | 1277.404 | -0.5 | -1   | 18.9 |
|          | 4 | O 10                             | 83.26 | 1277.405 | 0.5  | 0.1  | 19.2 |

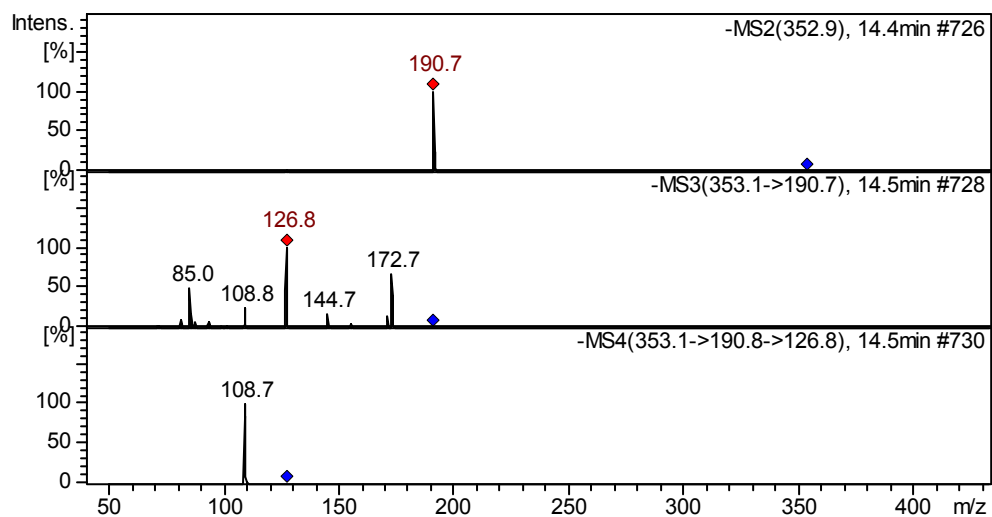

**Figure 1:** MS<sup>4</sup> Spectra of *muco-3-CQA*.

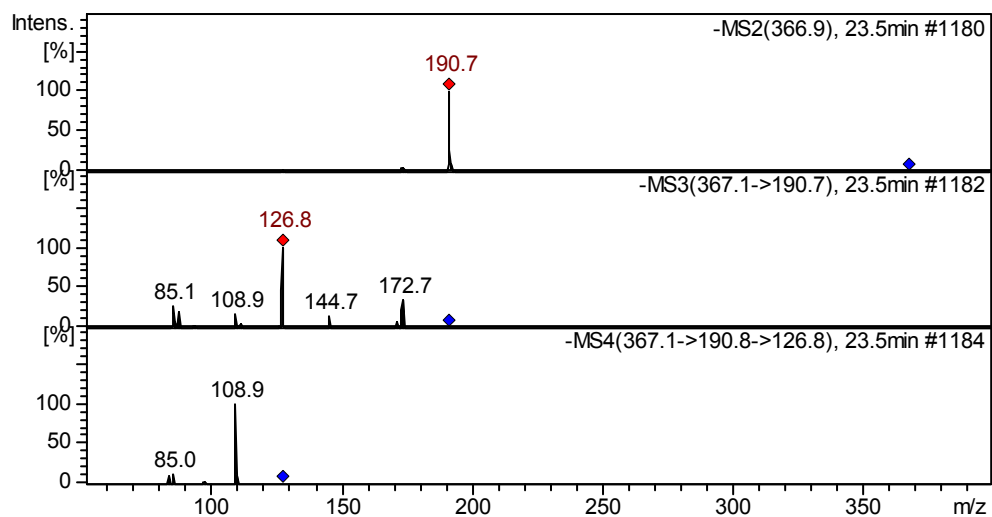

**Figure 2:** MS<sup>4</sup> Spectra of *muco*-3-FQA.

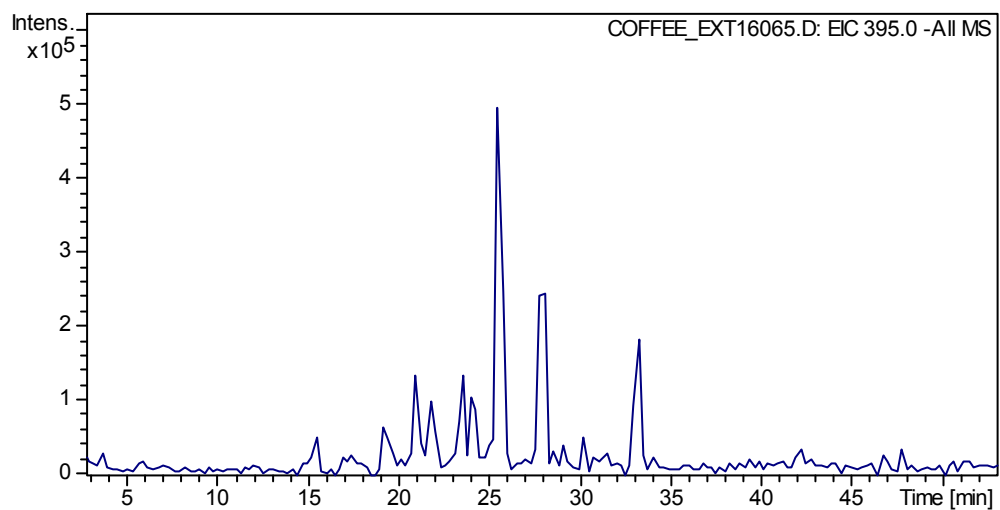

**Figure 3:** Extracted ion chromatogram (EIC) of acetates of chlorogenic acid (caffeoylquinic acid) at  $m/z$  395 in negative ion mode.

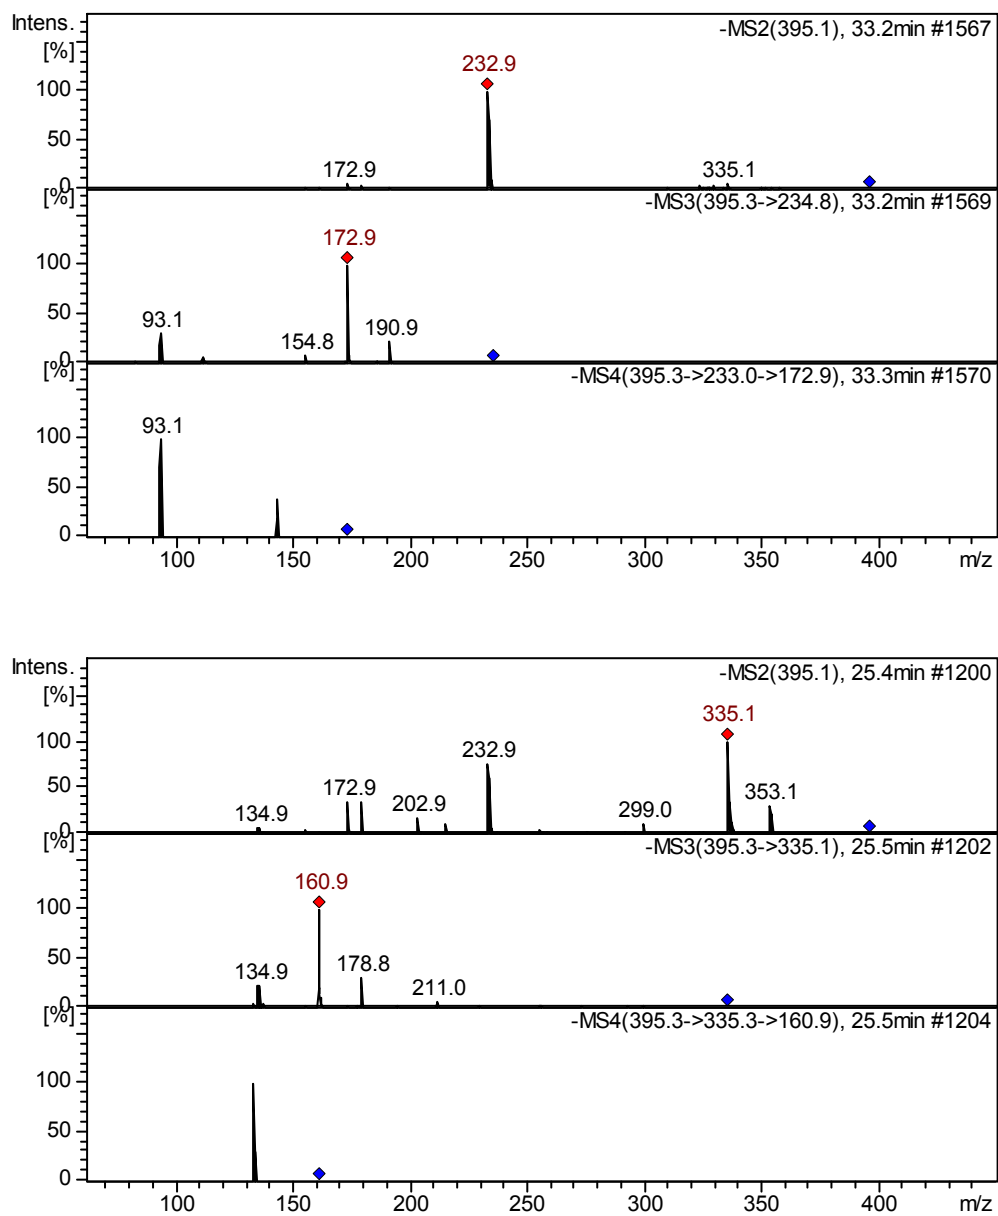

**Figure 4:** MS<sup>4</sup> of acetates of chlorogenic acid (caffeoylquinic acid) at  $m/z$  395 in negative ion mode.



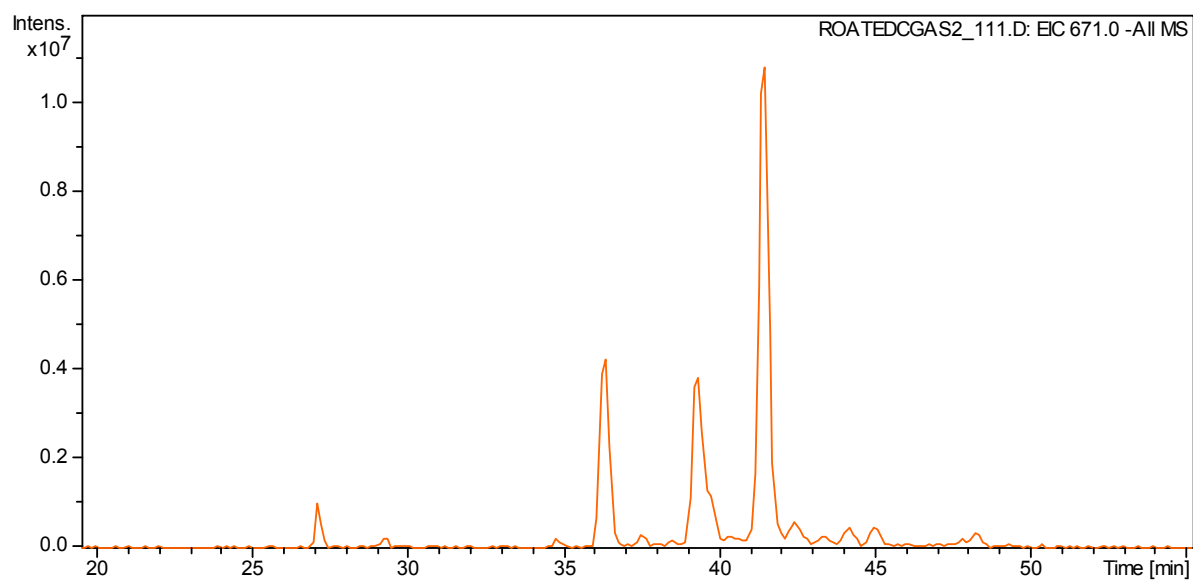

**Figure 5:** Extracted ion chromatogram (EIC) at  $m/z$  671 in negative ion mode.

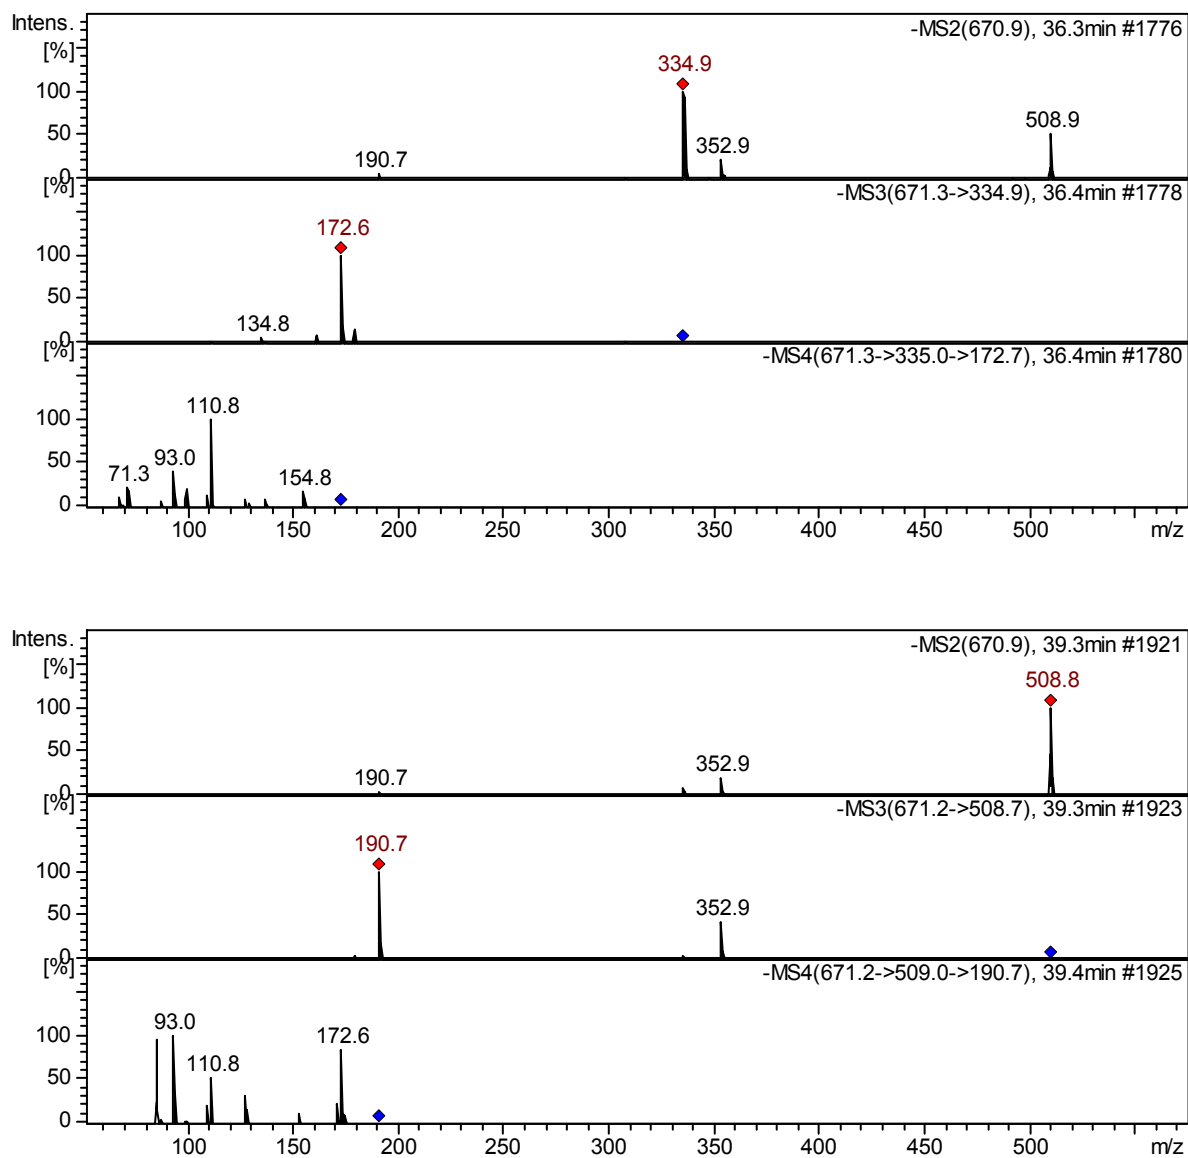

**Figure 6:** MS<sup>4</sup> at  $m/z$  671 in negative ion mode.

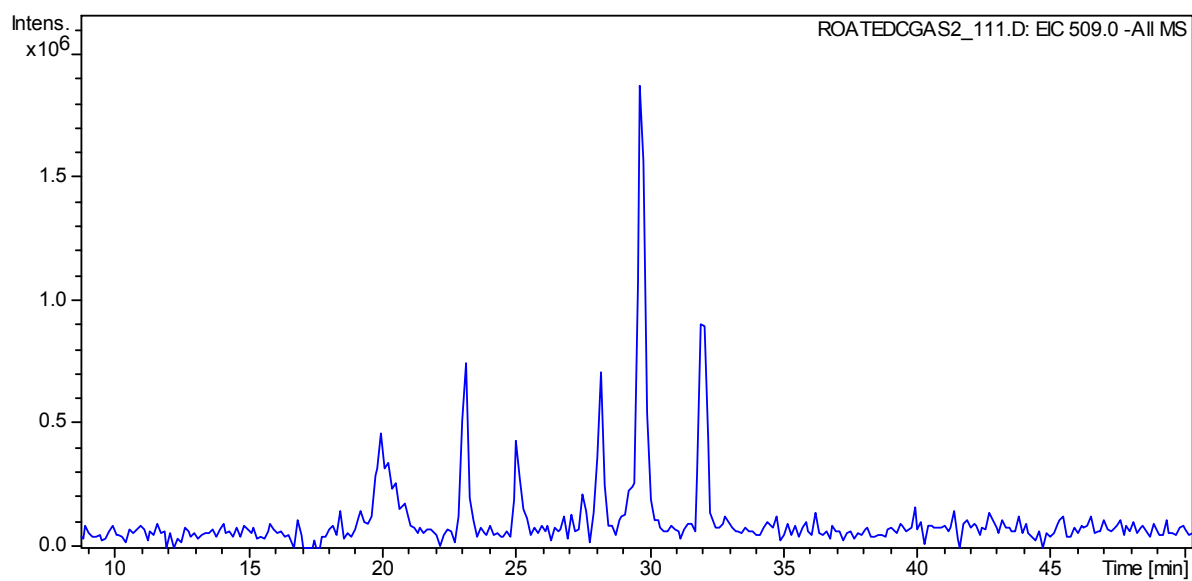

**Figure 7:** Extracted ion chromatogram (EIC) at  $m/z$  509 in negative ion mode.

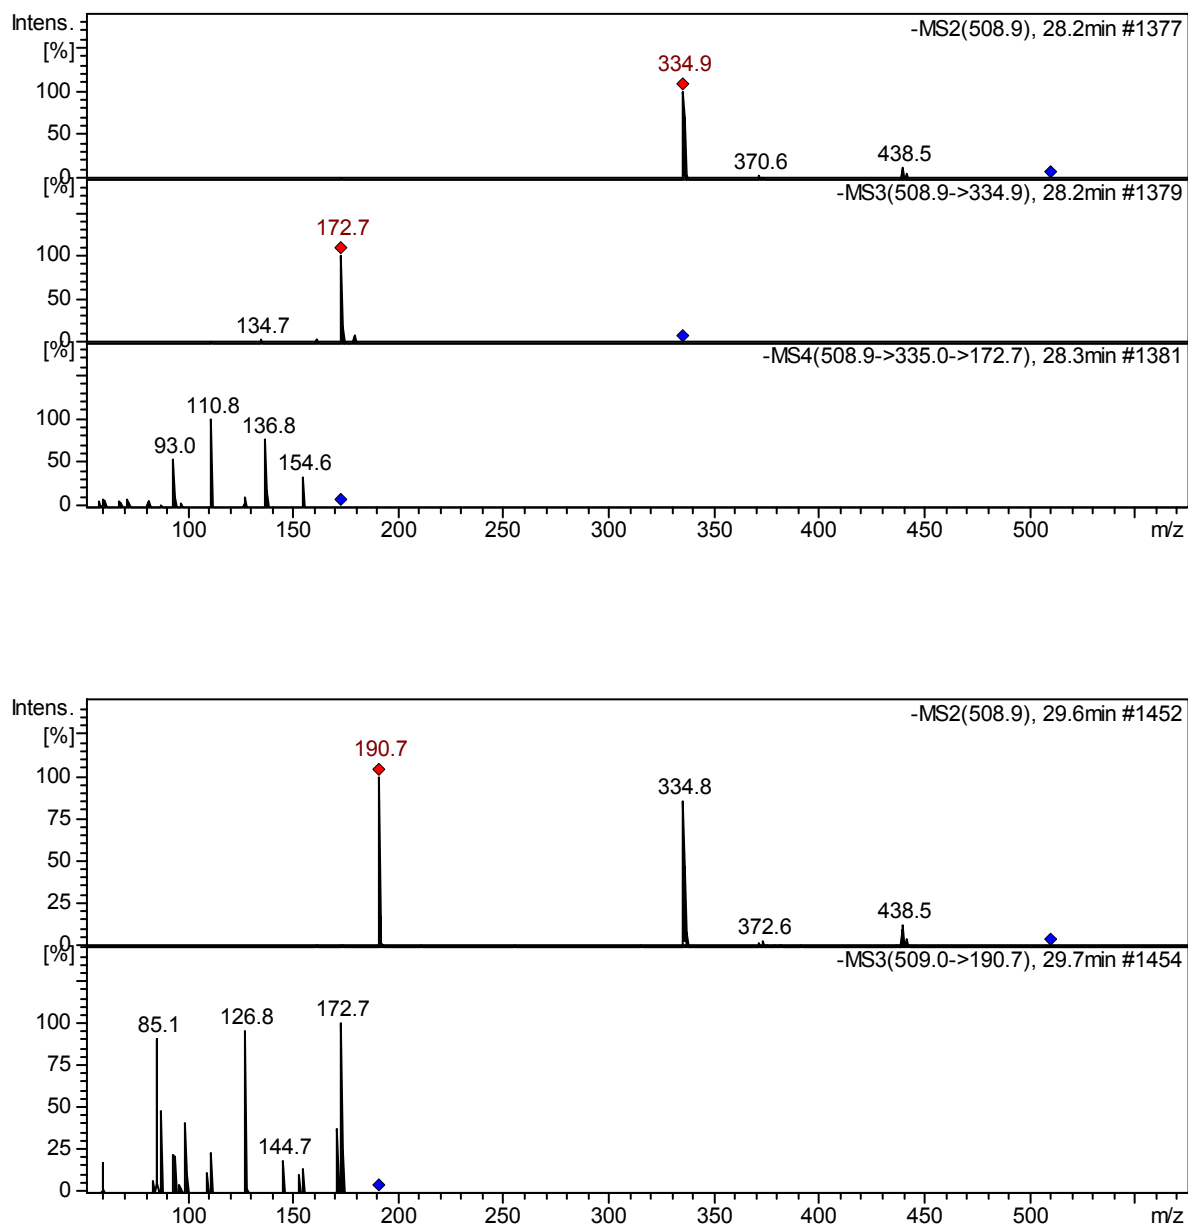

**Figure 8:** MS<sup>4</sup> at  $m/z$  509 in negative ion mode.

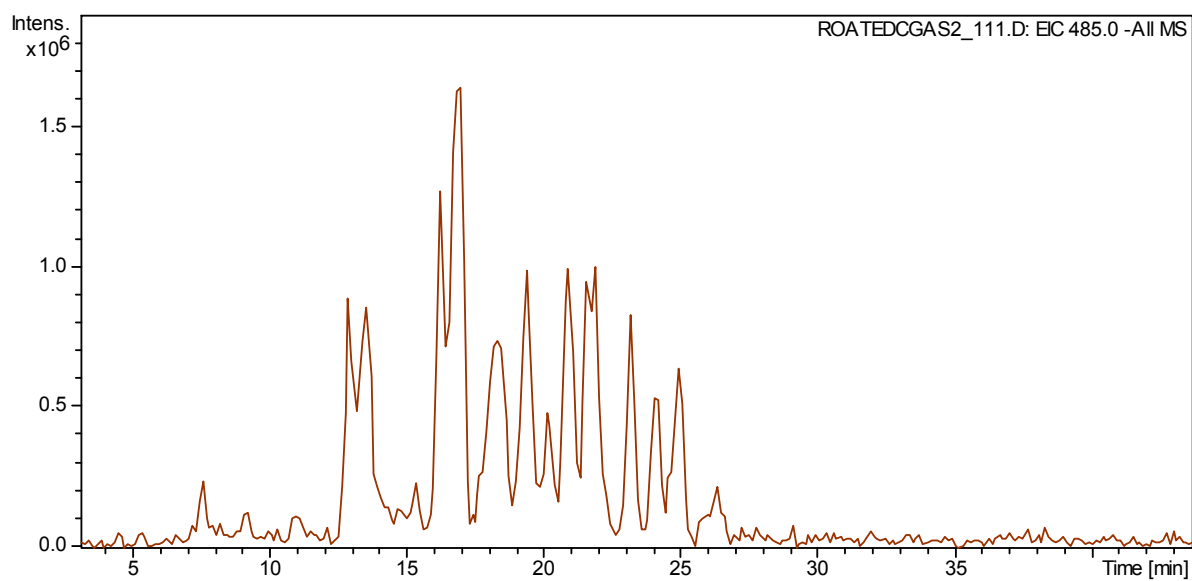

**Figure 9:** Extracted ion chromatogram (EIC) at  $m/z$  485 in negative ion mode.

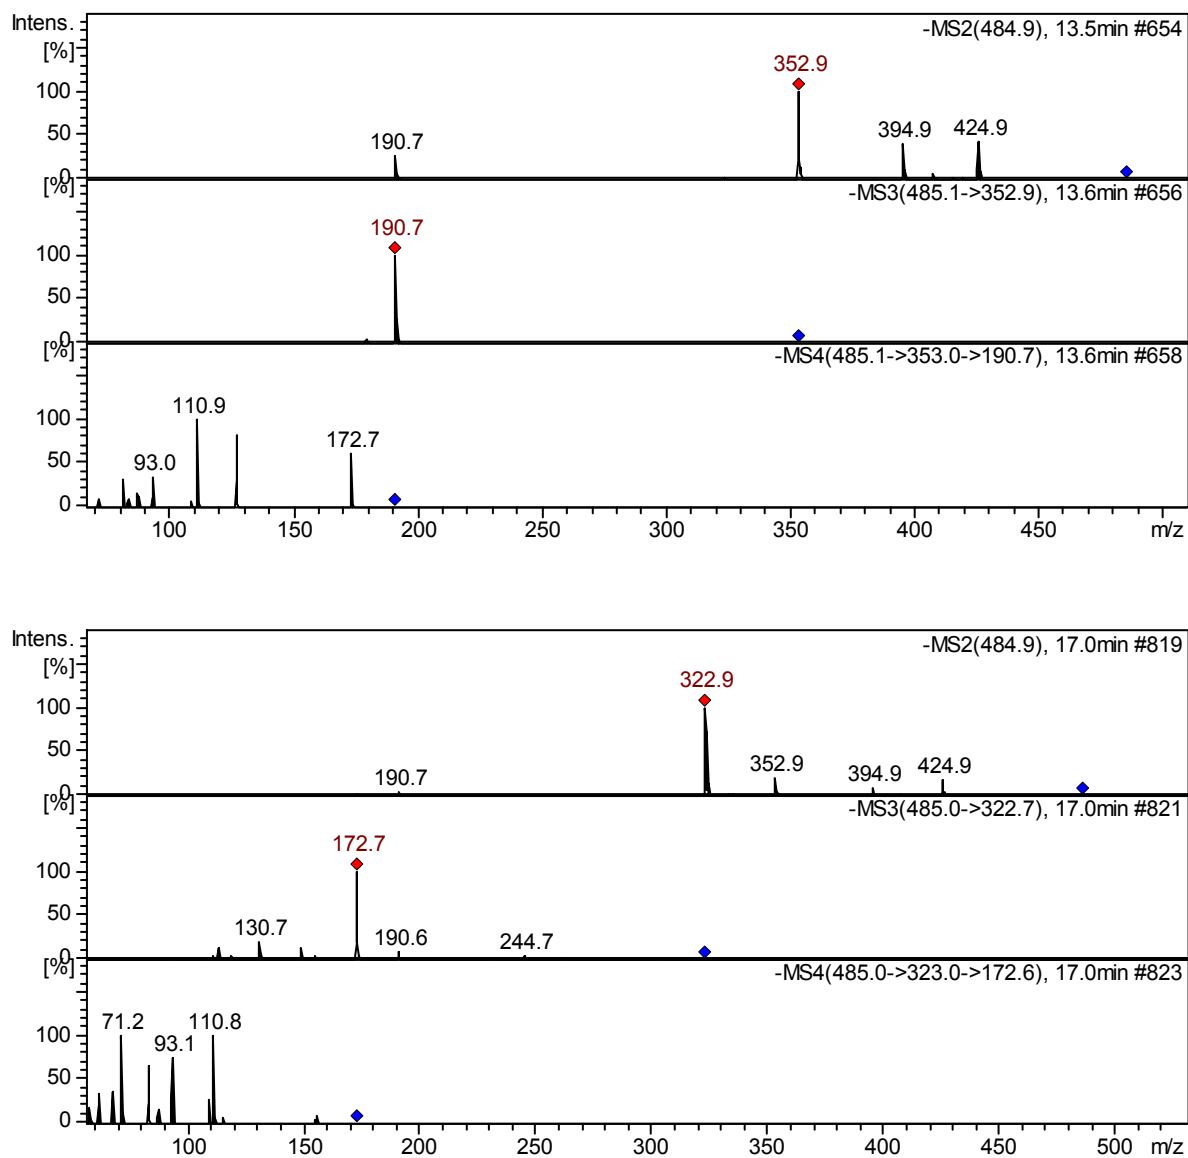

**Figure 10:** MS<sup>4</sup> at  $m/z$  485 in negative ion mode.
